# Supplementary material for: Cross-sectional questionnaire study of the experiences of community pharmacists in Northern Ireland during the early phases of the COVID-19 pandemic: preparation, experience and response
Source: PubMed Central journal article supplement — BMJ Open. 2022 Sep 22;12(9):e064545. doi: 10.1136/bmjopen-2022-064545 (PMC9511007; doi:10.1136/bmjopen-2022-064545), 2022-09-22
Supplement: bmjopen-2022-064545.draft_revisions.pdf [file bmjopen-2022-064545.draft_revisions.pdf]

# BMJ Open

BMJ Open is committed to open peer review. As part of this commitment we make the peer review history of every article we publish publicly available.

When an article is published we post the peer reviewers' comments and the authors' responses online. We also post the versions of the paper that were used during peer review. These are the versions that the peer review comments apply to.

The versions of the paper that follow are the versions that were submitted during the peer review process. They are not the versions of record or the final published versions. They should not be cited or distributed as the published version of this manuscript.

BMJ Open is an open access journal and the full, final, typeset and author-corrected version of record of the manuscript is available on our site with no access controls, subscription charges or pay-per-view fees (<http://bmjopen.bmj.com>).

If you have any questions on BMJ Open's open peer review process please email [info.bmjopen@bmj.com](mailto:info.bmjopen@bmj.com)

# BMJ Open

## **A cross-sectional questionnaire study of the experiences of community pharmacists during the early phases of the COVID-19 pandemic: preparation, experience and response**

|                               |                                                                                                                                                                                                                                                                                                                              |
|-------------------------------|------------------------------------------------------------------------------------------------------------------------------------------------------------------------------------------------------------------------------------------------------------------------------------------------------------------------------|
| Journal:                      | <i>BMJ Open</i>                                                                                                                                                                                                                                                                                                              |
| Manuscript ID                 | bmjopen-2022-064545                                                                                                                                                                                                                                                                                                          |
| Article Type:                 | Original research                                                                                                                                                                                                                                                                                                            |
| Date Submitted by the Author: | 06-May-2022                                                                                                                                                                                                                                                                                                                  |
| Complete List of Authors:     | Patterson, Susan M.; Queen's University Belfast Cadogan, Cathal; Trinity College Dublin, Pharmacy<br>Barry, Heather; Queen's University Belfast, School of Pharmacy<br>Bennett, Kathleen; Royal College of Surgeons in Ireland, Population Health Sciences<br>Hughes, Carmel; Queen's University Belfast, School of Pharmacy |
| Keywords:                     | COVID-19, Quality in health care < HEALTH SERVICES ADMINISTRATION & MANAGEMENT, PRIMARY CARE                                                                                                                                                                                                                                 |
|                               |                                                                                                                                                                                                                                                                                                                              |

SCHOLARONE™  
Manuscripts

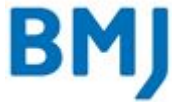

I, the Submitting Author has the right to grant and does grant on behalf of all authors of the Work (as defined in the below author licence), an exclusive licence and/or a non-exclusive licence for contributions from authors who are: i) UK Crown employees; ii) where BMJ has agreed a CC-BY licence shall apply, and/or iii) in accordance with the terms applicable for US Federal Government officers or employees acting as part of their official duties; on a worldwide, perpetual, irrevocable, royalty-free basis to BMJ Publishing Group Ltd ("BMJ") its licensees and where the relevant Journal is co-owned by BMJ to the co-owners of the Journal, to publish the Work in this journal and any other BMJ products and to exploit all rights, as set out in our [licence](#).

The Submitting Author accepts and understands that any supply made under these terms is made by BMJ to the Submitting Author unless you are acting as an employee on behalf of your employer or a postgraduate student of an affiliated institution which is paying any applicable article publishing charge ("APC") for Open Access articles. Where the Submitting Author wishes to make the Work available on an Open Access basis (and intends to pay the relevant APC), the terms of reuse of such Open Access shall be governed by a Creative Commons licence – details of these licences and which [Creative Commons](#) licence will apply to this Work are set out in our licence referred to above.

Other than as permitted in any relevant BMJ Author's Self Archiving Policies, I confirm this Work has not been accepted for publication elsewhere, is not being considered for publication elsewhere and does not duplicate material already published. I confirm all authors consent to publication of this Work and authorise the granting of this licence.

1  
2  
3 **A cross-sectional questionnaire study of the experiences of community pharmacists during**  
4 **the early phases of the COVID-19 pandemic: preparation, experience and response**  
5

6 Susan M. Patterson<sup>1</sup>, Cathal A. Cadogan<sup>2</sup>, Heather E. Barry<sup>1</sup>, Kathleen Bennett<sup>3</sup>, Carmel M.  
7 Hughes<sup>1\*</sup>  
8

9  
10 <sup>1</sup>School of Pharmacy, Queen's University Belfast

11  
12 <sup>2</sup>School of Pharmacy and Pharmaceutical Sciences, Trinity College Dublin

13  
14 <sup>3</sup>Data Science Centre, School of Population Health, Royal College of Surgeons in Ireland,  
15 Dublin  
16

17  
18  
19 \*Author for correspondence; Carmel M. Hughes, School of Pharmacy, Queen's University  
20 Belfast, 97 Lisburn Road, Belfast, BT9 7BL, Northern Ireland. Email: c.hughes@qub.ac.uk  
21  
22  
23  
24  
25  
26  
27  
28  
29  
30  
31  
32  
33  
34  
35  
36  
37  
38  
39  
40  
41  
42  
43  
44  
45  
46  
47  
48  
49  
50  
51  
52  
53  
54  
55  
56  
57  
58  
59  
60

## ABSTRACT

**Objectives:** To examine the views and experiences of the community pharmacy workforce in Northern Ireland (NI) regarding changes in community pharmacy practice/processes in preparation for, and response to, the COVID-19 pandemic.

**Design:** Cross-sectional telephone-administered questionnaire.

**Setting and participants:** Geographically stratified representative sample of 130 community pharmacists in NI between March and May 2021.

**Outcome measures:** Community pharmacists' responses to questions focusing on their preparation, experience and response to the COVID-19 pandemic. Descriptive analysis was conducted including frequencies and percentages. Free-text comments were summarised using thematic analysis.

**Results:** One hundred and thirty pharmacists completed the questionnaire. Pharmacists responded comprehensively to implementing infection control measures, e.g. management of social distancing in the shop (n=125, 96.2%), making adjustments to premises, e.g. barriers/screens (n=124, 95.4%), while maintaining medicines supply (n=130, 100.0%) and advice to patients (n=121, 93.1%). Newly commissioned services were provided, e.g. emergency supply service (n=121, 93.1%), flu vaccination for healthcare workers (n=101, 77.7%) and volunteer deliveries to vulnerable people (n=71, 54.6%). Pharmacists were least prepared for the increased workload and patients' challenging behaviour, but the majority (n=126, 96.9%) reported that they felt better prepared during the second wave. Pharmacists agreed/strongly agreed that they would be able to re-establish normal services (n=114, 87.7%), were willing to administer COVID-19 vaccines (n=105, 80.7%) and provide COVID-19 testing (n=79, 60.8%) in the future.

**Conclusions:** The pharmacy workforce remained accessible and maintained supply of essential medicines and advice to patients throughout the pandemic. Provision of modified and additional services such as vaccination reinforced the clinical and public health role of pharmacy

### Strengths and limitations of this study

- Large representative sample of community pharmacists attained
- Method of questionnaire administration ensured there was very little missing data
- Focus on Northern Ireland making the results less generalisable

- 1
  - 2
  - 3
  - 4
  - 5
  - 6
  - 7
  - 8
  - 9
  - 10
  - 11
  - 12
  - 13
  - 14
  - 15
  - 16
  - 17
  - 18
  - 19
  - 20
  - 21
  - 22
  - 23
  - 24
  - 25
  - 26
  - 27
  - 28
  - 29
  - 30
  - 31
  - 32
  - 33
  - 34
  - 35
  - 36
  - 37
  - 38
  - 39
  - 40
  - 41
  - 42
  - 43
  - 44
  - 45
  - 46
  - 47
  - 48
  - 49
  - 50
  - 51
  - 52
  - 53
  - 54
  - 55
  - 56
  - 57
  - 58
  - 59
  - 60
- Method of questionnaire administration limited the number of pharmacists who could be contacted due to time and resource constraints

For peer review only

## INTRODUCTION

Since March 2020, healthcare provision has faced one of its greatest challenges in responding to the COVID-19 pandemic. Health services have been under immense pressure to provide information, prevent and manage COVID infection, and deal with the long-term sequelae of infection, while trying to maintain care for other patients with acute and long-term conditions. Community pharmacy is one of the most accessible health sectors and has played a vital frontline role during key stages of the current COVID-19 pandemic (i.e. prevention, preparedness, response, recovery).<sup>1,2,3,4</sup> Amid the restrictions imposed following the onset of the pandemic, community pharmacy was deemed an essential service which reflects the centrality of medicines to everyday life.<sup>5</sup> Governments and professional organisations in various countries have specifically acknowledged the need to support and maximise pharmacy as a resource in maintaining delivery of patient care.<sup>6</sup>

As society begins to emerge from the worst of the pandemic, it is important to learn from the experience so that health services can appropriately prepare for the next pandemic or emergency health crisis. This requires a consideration of the experiences of healthcare professionals who have worked during COVID-19. Therefore, the aim of this present study was to examine the immediate views and experiences of the community pharmacy workforce in Northern Ireland (NI) regarding changes in community pharmacy practice/processes in preparation for, and response to the COVID-19 pandemic.

## METHOD

A cross-sectional study was undertaken involving administration of a brief telephone questionnaire with community pharmacists in NI to examine their immediate views and experiences of changes in community pharmacy practice/processes in preparation for, and in response to, COVID-19. This study received ethical approval from the Queen's University Belfast Faculty of Medicine, Health and Life Sciences Research Ethics Committee (Ref. No. MHLS 21\_21).

### Patient and Public Involvement

Two patient and public involvement (PPI) representatives were recruited to the Study Advisory Group via the Patient Involvement Enhancing Research (PIER) NI network from the

1  
2  
3 Health and Social Care Research and Development division. The Study Advisory Group also  
4 included members of the pharmacy profession representing practice, regulation and  
5 professional advocacy, along with a methodological advisor. The Group contributed to the  
6 development of the telephone questionnaire (see below) and advised on other aspects of the  
7 study.  
8  
9  
10  
11  
12

### 13 14 **Questionnaire development**

15  
16 The telephone questionnaire was developed based on documentary analysis of key policy  
17 publications from health policy, commissioning and professional organisations in NI, and  
18 relevant literature describing a framework of activities that pharmacy personnel can  
19 undertake in preparation/response to crises such as COVID-19.<sup>7 8</sup> The questionnaire  
20 included items on demographics, followed by six main sections encompassing community  
21 pharmacists' experiences of working during the pandemic and specifically during March-  
22 May 2020 (Wave 1) and September-December 2020 (Wave 2) , i.e. (1) prevention of  
23 infection spread, (2) maintaining pharmacy services, (3) preparedness for and response to  
24 the COVID-19 pandemic, (4) communicating with others (5) updating professional  
25 knowledge and (6) looking to the future. To minimise the impact of administering the  
26 questionnaire on daily practice, the content was designed to ensure that the questionnaire  
27 was concise. Respondents could skip any questions that they preferred not to answer. It was  
28 piloted with volunteer community pharmacists (n=5) to assess face and content validity and  
29 was refined on the basis of their responses. This piloting indicated that completion time for  
30 the questionnaire was approximately 15 minutes. Pilot responses were not included in the  
31 final analysis. A copy of the questionnaire is provided in Supplementary File 1.  
32  
33  
34  
35  
36  
37  
38  
39  
40  
41  
42  
43  
44  
45

### 46 **Sampling**

47  
48 A purposive and geographically stratified sample of community pharmacists was recruited  
49 for the study. Using the publicly available information on contact details of registered  
50 pharmacies in NI, community pharmacies were stratified according to Local Commissioning  
51 Group (LCG) areas, of which there are five. LCGs commission health and social care services  
52 based on the needs of local populations. The numbers sampled were in proportion to the  
53 number of registered pharmacies in each locality to ensure representation across NI.  
54  
55  
56  
57  
58  
59  
60



1  
2  
3 In November 2020, there were 528 community pharmacies in NI. In order to attain a  
4 statistically representative sample of pharmacists across NI, and to estimate the percentage  
5 response to any questions in the questionnaire within a precision of  $\pm 7.5\%$  (i.e. a 95%  
6 confidence level to within  $\pm 7.5\%$  of any questionnaire responses), a sample of  $n=130$   
7 respondents to the questionnaire was required. Based on the total number of pharmacies  
8 across NI ( $n=528$ ) and an anticipated response rate of 30%, up to a maximum number of 433  
9 pharmacies were contacted (from the 528) to achieve the required sample size ( $n=130$ ). This  
10 equated to a sampling fraction of 24% of the total number of pharmacies. Within each LCG  
11 area, a random list of pharmacies was generated. Pharmacies were telephoned sequentially  
12 in each LCG area by the researcher (SP) using the random list until the required number  
13 within each LCG area was achieved.

### 24 **Recruitment and consent**

25  
26 To raise awareness in advance of recruitment, summary information about the study was  
27 made available to all community pharmacies through a number of pharmacy organisations  
28 e.g. Pharmacy Forum, Community Pharmacy NI, with close links with the community  
29 pharmacy sector.

30  
31 Pharmacies were contacted by telephone (using publicly available contact details) in  
32 random order across the LCGs by the researcher (SP). SP briefly outlined the study and  
33 referred to the summary information circulated to pharmacies in advance to determine if a  
34 pharmacist would be interested in taking part. SP advised that the questionnaire would take  
35 approximately 15 minutes to complete. Community pharmacists were offered the  
36 opportunity to complete the questionnaire during the telephone call or to arrange a later  
37 time and date that was more convenient. Further information about the study, if requested,  
38 was provided via email. Community pharmacists interested in taking part were asked to  
39 provide verbal consent over the telephone; this was documented and audio-recorded. The  
40 explicit yes/no responses for consent were documented on the telephone questionnaire  
41 form. The records of consent were stored separately from the completed questionnaire  
42 responses.

### 57 **Data collection**

1  
2  
3 A unique study ID number was assigned to each community pharmacist participant and  
4 recorded on a hard copy of the questionnaire. The study IDs were stored in a password-  
5 protected Microsoft Excel spreadsheet which acted as a log, linking ID numbers to  
6 respondents known only to the researcher and stored on the researcher's secure and  
7 password-protected laptop. Verbal responses to the questions were recorded by the  
8 researcher (SP) on the form. If the community pharmacist was interrupted during the  
9 questionnaire data collection, they were asked if they were willing to complete the  
10 questionnaire at a later time and an appointment was arranged.  
11  
12  
13  
14  
15  
16  
17

### 18 **Data analysis**

19  
20  
21 Data were analysed descriptively using SPSS v27 (SPSS Inc., Chicago, IL, USA), reporting  
22 frequencies, percentages and 95% confidence intervals. Free text responses to questions  
23 were recorded, and grouped into broad themes.  
24  
25  
26

### 27 **RESULTS**

28  
29  
30 During March–May 2021, the researcher initially invited 175 community pharmacists. One  
31 hundred and thirty-nine (79.4%) community pharmacists agreed to participate and 130  
32 (74.3%) completed the questionnaire by telephone with the researcher (representing 130  
33 pharmacies). Nine community pharmacists were unable to complete the survey due to  
34 interruptions during administration and could not be contacted again. Completion of the  
35 telephone questionnaires took 46 working days, with 110 (62.9%) community pharmacists  
36 deferring the call to another day due to work pressures at the time of the arranged call.  
37  
38  
39  
40  
41  
42

43 The demographic characteristics of the 130 participating community pharmacists are  
44 reported in Table 1 and the characteristics of the pharmacies in which they worked are  
45 reported in Table 2. There was a higher percentage (55.4%) of pharmacist respondents who  
46 were female, most participants were aged between 25-54 years old, and 36.2% had been in  
47 practice for more than 11 years. The majority of respondents were employees (80.8%) and  
48 just over 50% (51.5%) were dispensary managers. The pharmacies in which the respondents  
49 worked were located in largely urban (43.1%) or suburban settings (37.7%); just over 30%  
50 (32.3%) were independently owned and 38.5% were part of a large chain (group of more  
51 than 20 pharmacies).  
52  
53  
54  
55  
56  
57  
58  
59  
60

**Table 1. Demographic characteristics of community pharmacists who completed the telephone questionnaire**

| Characteristic                                        | n (%)      |
|-------------------------------------------------------|------------|
| <u>Gender</u>                                         |            |
| Female                                                | 72 (55.4)  |
| Male                                                  | 58 (44.6)  |
| <u>Age</u>                                            |            |
| < 25 years                                            | 6 (4.6)    |
| 25-34 years                                           | 53 (40.8)  |
| 35-44 years                                           | 38 (29.2)  |
| 45-54 years                                           | 21 (16.2)  |
| ≥ 55 years                                            | 12 (9.2)   |
| <u>Number of years in community pharmacy practice</u> |            |
| ≤ 5 years                                             | 36 (27.7)  |
| 6-10 years                                            | 22 (16.9)  |
| 11-15 years                                           | 25 (19.2)  |
| ≥ 15 years                                            | -          |
| <u>Status</u>                                         |            |
| Owner/contractor                                      | 25 (19.2)  |
| Employee                                              | 105 (80.8) |
| <u>Usual Role</u>                                     |            |
| Owner manager                                         | 17 (13.1)  |
| Responsible pharmacist                                | 12 (9.2)   |
| Dispensary manager                                    | 67 (51.5)  |
| Locum pharmacist                                      | 13 (10.0)  |
| Pharmacist team member                                | 15 (11.5)  |
| Superintendent                                        | 6 (4.6)    |
| Shielding during Wave 1*                              | 8 (6.2)    |

\*Measures taken by those at highest risk of severe illness from COVID-19 (e.g. self-isolation)

**Table 2. Characteristics of participating community pharmacies**

| Geographical Location (LCG Area) | n (%)     |
|----------------------------------|-----------|
| Belfast                          | 32 (24.6) |
| Northern                         | 28 (21.5) |
| South-Eastern                    | 24 (18.5) |
| Southern                         | 22 (16.9) |

|                      |           |
|----------------------|-----------|
| Western              | 24 (18.5) |
| <b>Location Type</b> |           |
| Urban                | 56 (43.1) |
| Rural                | 36 (27.7) |
| Suburban             | 38 (29.2) |
| <b>Pharmacy Type</b> |           |
| Independent          | 42 (32.3) |
| Small chain <5       | 18 (13.8) |
| Medium chain 5-20    | 20 (15.4) |
| Large chain >20      | 50 (38.5) |

### Questionnaire section 1: Preventing the spread of COVID-19

During the first wave, the most common measure was the management of social distancing in the pharmacy (96.2%; n=125), including one-way systems, limiting capacity within the pharmacy, and queue management (Table 3). Adjustments such as the erection of barriers or screens, were made to premises in 95.4% (n=124) of pharmacies to reduce the risk of contact between staff and patients. Cleaning and disinfection of premises became a routine task during the pandemic first wave, implemented in 93.8% (n=122) of pharmacies and performed at least twice a day in most. Public health information was displayed in 92.3% (n=120) pharmacies, using materials from the public health campaigns that focused on COVID-19-related issues.

**Table 3 Measures taken during the onset of the pandemic (March-May 2020) to prevent the spread of COVID-19 in community pharmacies**

| Prevention of Infection Measures               | Implemented in March-May 2020 |          | Stopped in June-August 2020 |            | Started at a later date (after September 2020) n (%) |
|------------------------------------------------|-------------------------------|----------|-----------------------------|------------|------------------------------------------------------|
|                                                | Yes n (%)                     | No n (%) | Yes n (%)                   | No n (%)   |                                                      |
| Management of social distancing in the shop    | 125 (96.2)                    | 5 (3.8)  | ~                           | 122 (93.8) | ~                                                    |
| Premises adjustments such as barriers, screens | 124 (95.4)                    | 6 (4.6)  | 115 (88.5)                  | 9 (6.9)    | 5 (3.8)                                              |

|                                                            |               |              |              |               |             |
|------------------------------------------------------------|---------------|--------------|--------------|---------------|-------------|
| Protocols for disinfection of pharmacy surfaces            | 122<br>(93.8) | 8<br>(6.2)   | 5<br>(3.8)   | 122<br>(93.8) | 0<br>(0.0)  |
| Public health information on preventing Covid-19 displayed | 120<br>(92.3) | 10<br>(7.7)  | ~            | 119<br>(91.5) | ~           |
| Reduced face-to-face contact                               | 120<br>(92.3) | 10<br>(7.7)  | 6<br>(4.6)   | 116<br>(89.2) | 0<br>(0.0)  |
| Lunchtime closing                                          | 119<br>(91.5) | 11<br>(8.5)  | 63<br>(48.5) | 55<br>(42.3)  | ~           |
| Use of PPE by pharmacy staff                               | 115<br>(88.5) | 15<br>(11.5) | ~            | 116<br>(89.2) | 11<br>(8.5) |
| Changes to the use of the available space                  | 98<br>(75.4)  | 32<br>(24.6) | 7<br>(5.4)   | 92<br>(70.8)  | ~           |
| Shorter opening hours                                      | 87<br>(66.9)  | 43<br>(33.1) | 69<br>(53.1) | 17<br>(13.1)  | 0<br>(0.0)  |
| Changes to staff working patterns                          | 64<br>(49.2)  | 66<br>(50.8) | 9<br>(6.9)   | 57<br>(43.8)  | ~           |

~ not reported as less than 5, and potentially identifiable; PPE: personal protective equipment

During the first wave, 88.5% (n=115), community pharmacists reported that staff were using personal protective equipment (PPE). When asked for further comments, pharmacists reported how government advice on PPE had changed and there was conflicting advice from other sources. Community pharmacists were concerned about protecting their staff, especially those with vulnerable family members and some introduced early protection measures, e.g. making visors when PPE was in short supply, ensuring adequate ventilation, setting up dispensary workstations two metres apart and asking delivery drivers to wear protective clothing.

Many pharmacies (75.4%; n=98) closed the shop floor space entirely or reduced it and reused the space to prepare and check prescriptions, monitored dosage system boxes and orders for delivery. Working patterns and break times were changed in 49.2% (n=64) pharmacies to reduce the number of staff working at any one time. Many staff worked longer hours and started early to manage the increased volume of prescriptions. Many of the changes outlined in Table 4 were maintained over the time periods assessed, except

1  
2  
3 lunchtime closing, which was stopped in almost 50% of pharmacies (48.5% n=63) in June-  
4  
5 August 2020.  
6

## 7 **Questionnaire section 2: Maintaining pharmacy services during the pandemic**

8  
9

10 Community pharmacies normally provide a wide range of core services (provided by all  
11 pharmacies) or locally commissioned services (delivered by choice or driven by local need).  
12 At the outset of the pandemic, the commissioners stood down a number of additional  
13 patient-facing services, e.g. Medicines Use Reviews (MURs); some of these were  
14 reintroduced at a later date, e.g. Minor Ailments and Smoking Cessation (September 2020)  
15 with appropriate COVID-safe modifications. The immediate actions taken in relation to  
16 community pharmacy services in response to the pandemic and over time, up to the end of  
17 December 2020 are described below.  
18  
19  
20  
21  
22  
23  
24  
25

26 Core pharmacy services, principally dispensing, continued to be provided from all  
27 pharmacies throughout March–December 2020, while over-the-counter (OTC) medicines  
28 advice and supply were available from 128 (98.5%) and 121 (93.1%) pharmacies respectively  
29 (Table 4). Prescription collection and delivery services were maintained (and increased) by  
30 the majority of pharmacies (95.4%; n=124 and 88.5%; n=115 respectively). Of the 84 (64.6%)  
31 pharmacies that provided out-of-hours dispensing services, two stopped service provision  
32 during March-May 2020 and one restarted with a modified service during September-  
33 December 2020. Some pharmacies did not restart services until September-December 2020  
34 and then provided them in a modified format, e.g. nursing home advice was provided by  
35 telephone or videocall by 12 (9.2%) pharmacies during Wave 2. All participating pharmacies,  
36 except one, normally provided Living Well campaigns (provision of key public health  
37 messages and advice through community pharmacies); 55 (42.3%) stopped this service at  
38 the onset of the pandemic, but by June-August 2020, 44 (33.8%) had restarted modified  
39 campaigns providing COVID-19 information to the public.  
40  
41  
42  
43  
44  
45  
46  
47  
48  
49  
50  
51

52 Most of the non-core services were stood down during March-May 2020, with the notable  
53 exception of needle and syringe exchange services (NSES) which were modified to reduce  
54 the COVID-19 transmission risk. Just over 70% (71.5%; n=93) of community pharmacies  
55 stopped smoking cessation services, 56.2% (n=73) restarted the service during June-August  
56 2020 and 16.1% (n=21) reported providing a modified service by September-December  
57  
58  
59  
60

2020. Pharmacists reported that opioid substitution treatment supervision (OST) was initially stopped, but then as patients' needs were reassessed, it was recommenced in a modified format, e.g increased supervision by addiction team staff. Most private travel vaccination services did not restart as there was little demand for them.

During the pandemic, a number of new services were commissioned and provided by community pharmacies. In addition, many new initiatives were undertaken as the pandemic progressed such as "drive-through" pharmacies or the equivalent such as 'call and collect' and measures to flag/assist patients with sensitive issues such as domestic violence reporting. The new services/initiatives and their status over time are presented in Table 4 below:

**Table 4. Newly commissioned services and community pharmacy initiatives during the COVID-19 pandemic.**

| New Services or Initiatives                                                                | Implemented in March-May 2020<br>n (%) |              | Stopped in June-August 2020<br>n (%) |               | Started at a later date<br>n (%) |
|--------------------------------------------------------------------------------------------|----------------------------------------|--------------|--------------------------------------|---------------|----------------------------------|
|                                                                                            | Yes                                    | No           | Yes                                  | No            |                                  |
| Emergency Supply during a pandemic service (ESS)                                           | 121<br>(93.1)                          | 9<br>(6.9)   | ~                                    | 117<br>(90.0) | 0 (0.0)                          |
| Flu vaccination service (frontline Health and Social Care workers)                         | 101<br>(77.7)                          | 29<br>(22.3) | 101<br>(77.7)                        | 0<br>(0.0)    | 0<br>(0.0)                       |
| Situation reporting (staffing/stock) to the Health and Social Care Board                   | 74<br>(56.9)                           | 56<br>(43.1) | 10<br>(7.7)                          | 64<br>(49.2)  | 0<br>(0.0)                       |
| Measures to flag/assist patients with sensitive issues such as domestic violence reporting | 73<br>(56.2)                           | 57<br>(43.8) | 0<br>(0.0)                           | 73<br>(56.2)  | 6<br>(4.6)                       |
| Prescription delivery by volunteers in the local community                                 | 71<br>(54.6)                           | 59<br>(45.4) | 32<br>(24.6)                         | 39<br>(30.0)  | 0<br>(0.0)                       |
| Referrals to Test and Trace services                                                       | 70<br>(53.8)                           | 60<br>(46.2) | ~                                    | 68<br>(52.3)  | 0<br>(0.0)                       |
| Employment of additional staff, e.g. dentists,                                             | 49<br>(37.7)                           | 81<br>(62.3) | 22<br>(16.9)                         | 27<br>(20.8)  | 0<br>(0.0)                       |

|                                                                                                                          |              |               |            |              |              |
|--------------------------------------------------------------------------------------------------------------------------|--------------|---------------|------------|--------------|--------------|
| volunteers, students, retired pharmacists                                                                                |              |               |            |              |              |
| Drive-through (or equivalent) pharmacy services                                                                          | 33<br>(25.4) | 97<br>(74.6)  | ~          | 32<br>(24.6) | 0<br>(0.0)   |
| Replenishment of care home pandemic packs                                                                                | 19<br>(14.6) | 107<br>(82.4) | ~          | 15<br>(11.5) | ~            |
| Palliative care on-call services                                                                                         | 19<br>(14.6) | 111<br>(85.4) | ~          | 17<br>(13.1) | 0<br>(0.0)   |
| Supply of medicines usually supplied in the hospital setting (e.g. oncology, antiretroviral drugs, 'Healthcare at Home') | 11<br>(8.5)  | 119<br>(91.5) | 0<br>(0.0) | 11<br>(8.5)  | 0<br>(0.0)   |
| Medicines delivery service (to vulnerable people) (commissioned September 2020)                                          | n/a          | n/a           | n/a        | n/a          | 95<br>(73.1) |

~ not reported as less than 5, and potentially identifiable

The Emergency Supply Service (allowing a month's supply of medicines to be provided in the absence of a prescription) was widely implemented from the onset of the pandemic. It was initially provided by 93.1% (n=121) of community pharmacies, four of whom stopped provision in June-August 2020. Pharmacists commented that this was due to an inappropriately excessive demand for pain medication in urban areas. The 'flu vaccination campaign was provided by 77.7% (n=101) of community pharmacies. Only 56.9% (n=74) reported participation in the Situation Reporting scheme (updating health officials on staffing and stock issues) and 56.2% (n=73) implemented measures to flag domestic violence ("Ask for ANI" initiative). Almost 55% (54.6%; n=71) used volunteer delivery services but by June-August 2020, 24.6% (n=32) had stopped and by September-December 2020, 73.1% (n=95) of pharmacies had switched to commissioned Home Delivery services. From free text comments, pharmacists commented that the volunteer services were invaluable but that in some cases, they had encountered problems with insurance and confidentiality issues.

### Questionnaire section 3: Preparedness for and response to the COVID-19 pandemic



Pharmacists were asked to recall the initial outbreak of the pandemic (March-May 2020) and to reflect on their level of preparedness. The responses are shown in Table 5 and illustrate the changes in preparedness over time. Initially, 74.6% (n=97) of pharmacies reported having had appropriate working patterns in place and 66.2% (n=86) had sufficient PPE available for staff at the onset of the pandemic, but after six months, this increased to 95.4% (n=124) and 99.2% (n=129) respectively. Increases were also seen over the time period in the number of pharmacies reporting that business continuity plans were in place in their premises for prolonged staff absences or for the eventuality of pharmacy closure. Employee pharmacists in pharmacy multiples reported that they did not know about the existence of business continuity plans or financial resources available during the pandemic, e.g. 54 (41.5%) were unaware of financial resources during March-May 2020. Pharmacies having sufficient information about PPE increased from 53.1% (n=69) during March-May 2020 to 99.2% (n=129) in September-December 2020, reflecting the increasing amount of advice relevant to community pharmacy available from Public Health England and the Department of Health in NI. Sufficient stocks and supplies of medicines and hand sanitisers increased over the same time periods from 65.4% (n=85) to 94.6% (n=123) and 35.4% (n=46) to 99.2% (n=129) respectively.

**Table 5. Community pharmacists' reflections on how prepared they felt they were for working during a pandemic**

| Did you have....                                                  | During March-May 2020 |              |                        | During September-December 2020 |             |                        |
|-------------------------------------------------------------------|-----------------------|--------------|------------------------|--------------------------------|-------------|------------------------|
|                                                                   | Yes<br>n (%)          | No<br>n (%)  | Don't<br>know<br>n (%) | Yes<br>n (%)                   | No<br>n (%) | Don't<br>know<br>n (%) |
| Appropriate staff working patterns in place                       | 97<br>(74.6)          | 33<br>(25.4) | 0<br>(0.0)             | 124<br>(95.4)                  | 6<br>(4.6)  | 0<br>(0.0)             |
| Enough supply of PPE for staff                                    | 86<br>(66.2)          | 44<br>(33.8) | 0<br>(0.0)             | 129<br>(99.2)                  | ~           | 0 (0.0)                |
| A business continuity plan in place for use in the event of staff | 85<br>(65.4)          | 26<br>(20)   | 19<br>(14.6)           | 101<br>(77.7)                  | 10<br>(7.7) | 19<br>(14.6)           |

|                                                                                        |              |              |              |               |               |              |
|----------------------------------------------------------------------------------------|--------------|--------------|--------------|---------------|---------------|--------------|
| absence over a prolonged period                                                        |              |              |              |               |               |              |
| A business continuity plan in place for use in the event of pharmacy closure           | 85<br>(65.4) | 21<br>(16.2) | 24<br>(18.5) | 100<br>(76.9) | 7<br>(5.4)    | 23<br>(17.7) |
| Enough stock and supply of essential prescription and OTC medicines                    | 85<br>(65.4) | 43<br>(33.1) | ~            | 123<br>(94.6) | 6 (6<br>(4.6) | ~            |
| Enough information about PPE requirements for staff                                    | 69<br>(53.1) | 60<br>(46.2) | ~            | 129<br>(99.2) | 0<br>(0.0)    | ~            |
| Enough financial resources to cover the additional demands on your pharmacy business   | 63<br>(48.5) | 13<br>(10.0) | 54<br>(41.5) | 76<br>(58.5)  | ~             | 53<br>(40.8) |
| A system to manage quantity limits for patients for the supply of individual medicines | 56<br>(43.1) | 73<br>(56.2) | ~            | 38<br>(29.2)  | 91<br>(70.0)  | ~            |
| Enough stock and supply of hand sanitisers                                             | 46<br>(35.4) | 83<br>(63.8) | ~            | 129<br>(99.2) | 1<br>(0.8)    | 0<br>(0.0)   |

~ not reported as less than 5, and potentially identifiable

Pharmacists were asked about what single aspect of their work they felt most prepared for and what they felt least prepared for. Forty-three pharmacists commented that they felt most prepared for continuing core services, i.e. normal dispensary work with the help of a good staff team (n=17) who demonstrated resilience and were able to keep going. They were least prepared for the surge in the workload and the increased demand for medicines (n=73), the behaviour (e.g. aggression) exhibited by the public (n=33) and wearing PPE and dealing with the risk of COVID-19 infection (n=21).

Almost all participating pharmacists (96.9%; n=126) reported that they felt better prepared for working during the second wave of the pandemic (September-December 2020) compared to the first wave (March-May 2020).

#### **Questionnaire Section 4: Communicating with others during the pandemic**

During the pandemic, 84.6% (n=110) pharmacists said that they communicated differently with GP practices and 86.9% (n=113) reported communicating differently with patients during the pandemic compared with beforehand. The dominance of telephone communication is evident, representing 75% (Figure 1a) and 69% (Figure 1b) of the communication methods used for GPs and patients respectively.

***Figure 1a and 1b about here***

#### **Questionnaire section 5: Updating professional knowledge during the pandemic**

Almost 90% of community pharmacists (86.9%; n=113) reported that sufficient training resources were available to them during the pandemic to maintain their professional knowledge. The reported use of COVID-19 resources is illustrated in Figure 2 below:

***Figure 2 about here***

Other information sources used by pharmacists were online professional courses (n=20), COVID-19 vaccine training courses (n=6) and miscellaneous resources, e.g. pharmacy publications. Pharmacists commented that they were overwhelmed by the volume of information (n=19), but sometimes they needed more, for example, clinical information (n=18), and that information changed frequently which was confusing (n=16).

#### **Questionnaire section 6: Looking to the future**

Using a five-point Likert-scale, pharmacists were asked for their views on three post-pandemic activities, ranging from “strongly agree” to “strongly disagree”. The activities related to re-establishing normal patient care services, COVID vaccinations and COVID testing. The responses are summarised in Figure 3.

***Figure 3 about here***

Almost 90% (87.7%; n=114) pharmacists agreed or strongly agreed that they would be able to establish normal patient care services post-pandemic. Eighty per cent (80.7%; n=105) agreed or strongly agreed that they would be willing to provide and administer COVID-19

1  
2  
3 vaccinations when they were available through community pharmacies in NI. Sixty per cent  
4 (60.8%; n=79) agreed or strongly agreed that they would be willing to provide COVID-19  
5 testing within the pharmacy if available in the future.  
6  
7  
8  
9

## 10 11 **DISCUSSION**

12  
13 This study has provided an overview of experience and activities of NI community  
14 pharmacists over the early waves of the pandemic. Pharmacists responded  
15 comprehensively to implementing infection control measures, while maintaining medicines  
16 supply and advice to patients and providing newly commissioned services. They were least  
17 prepared for the increased workload and patients' challenging behaviour, but the majority  
18 reported that they felt better prepared during the second wave of the pandemic.  
19 Pharmacists agreed/strongly agreed that they would be able to re-establish normal services,  
20 were willing to administer COVID-19 vaccines and provide COVID-19 testing in the future.  
21  
22  
23  
24  
25  
26  
27  
28  
29

30 The findings depict the activities undertaken by pharmacists in NI when the pandemic began  
31 in March 2020, with a focus on preventing the spread of infection, whilst also trying to  
32 maintain patient services. Pharmacies introduced a range of public health measures (social  
33 distancing, barriers, one-way systems, cleaning), and tried to provide PPE for staff, many of  
34 these measures have been noted in other community pharmacy studies.<sup>29</sup> Working  
35 patterns also changed to allow pharmacies to manage workload and to reduce the number  
36 of staff working at any one time. Many of these measures were sustained throughout 2020.  
37 By introducing such measures, pharmacists were able to maintain a range of core pharmacy  
38 services. However, it was deemed necessary to discontinue some services temporarily to  
39 allow critical tasks such as dispensing to continue. There was also an increase in collection  
40 and delivery services, particularly for vulnerable patients who were not in a position to  
41 come to a pharmacy personally. In circumstances such as these, priority will be given to  
42 what is deemed essential.<sup>10</sup>  
43  
44  
45  
46  
47  
48  
49  
50  
51  
52  
53  
54

55 The onset of the pandemic also provided an opportunity to innovate and introduce new  
56 services. Of particular note was the widespread introduction of a new emergency supply  
57 system for medicines and a 'flu vaccination service specifically for frontline health workers  
58  
59  
60

1  
2  
3 (thus paving the way for COVID vaccinations later). There was also involvement in initiatives  
4 to help patients subjected to domestic violence. Many of these services reinforced the  
5 public health role of pharmacists and reflected the accessibility of the profession at a time  
6 when many other services were not available to patients.<sup>4 11</sup>  
7  
8  
9

10  
11  
12 As might be expected, there was an increase in the reported perceived level of  
13 preparedness by pharmacists on most aspects of practice from March-May 2020 compared  
14 to September-December 2020. Notable increases were observed in having sufficient PPE  
15 (and relevant information) and hand sanitiser stock, and supplies of medicines. As  
16 pharmacists gained experience of working under pandemic conditions, there would have  
17 been growing awareness of where to access supplies such as PPE, and a better sense of the  
18 demand for medicines.<sup>2</sup> Some of these changes in working practices also represented areas  
19 for which they felt most and least prepared. Although they felt most prepared for  
20 maintaining core services such as dispensing, the increase in requirements for medicines  
21 and resultant increase in workload was somewhat unexpected.<sup>12</sup> These issues have been  
22 previously reported.<sup>4 13</sup>  
23  
24  
25  
26  
27  
28  
29  
30  
31  
32  
33

34 Methods of communication needed to change with GPs and patients due to practices being  
35 closed, or patients isolating or being unable to come to the pharmacy in person. Telephone  
36 contact was the most common mode of communication. Although the use of online  
37 platforms for remote consultations has increased within general practice,<sup>14</sup> based on the  
38 findings of this survey, this does not seem to have been replicated to the same extent in  
39 community pharmacy, and which has also been noted elsewhere.<sup>15</sup>  
40  
41  
42  
43  
44  
45  
46

47 Community pharmacists continued to maintain their professional knowledge over the  
48 course of the pandemic, largely in relation to COVID-19. Resources used mostly came from  
49 official sources such as the Department of Health, or professional organisations. Some  
50 pharmacists reported that the volume of information was overwhelming, or indeed  
51 contradictory which has been noted in other countries (e.g. USA, Netherlands).<sup>2 15</sup> The  
52 evidence base relating to COVID-19 changed rapidly, and other health professionals have  
53 reported how difficult it was to keep up-to-date.<sup>16</sup> An important lesson for future pandemic  
54  
55  
56  
57  
58  
59  
60

1  
2  
3 planning is the need to rationalise the amount of information being released to health care  
4 professionals and to ensure consistency across different sources.  
5  
6  
7

8  
9 As pharmacists looked to a post-pandemic future, they were confident that they could re-  
10 establish normal services, but also participate in ongoing public health efforts such as  
11 COVID-19 vaccination and testing. Indeed, the latter two activities have become part of  
12 practice, with community pharmacy making a significant contribution to the vaccination  
13 programme,<sup>17</sup> and playing a critical role in the supply of lateral flow tests.<sup>18 19</sup>  
14  
15  
16  
17  
18

19  
20 The study has a number of strengths. We attained our target sample, and the mode of  
21 administration ensured that there was very little missing data. The sample was stratified  
22 ensuring broad geographical representation from across NI. However, the focus on NI is one  
23 of the limitations as the findings may not be generalisable to other regions within or beyond  
24 the UK. Telephone administration also meant that we were limited in the number of  
25 pharmacists who could be contacted due to time and resource constraints. Other modes of  
26 administration of the questionnaire had been considered, e.g. postal or online, but in view  
27 of the busyness of community pharmacies during the pandemic, we concluded that direct  
28 contact by telephone might yield a better response rate. Experience with postal  
29 questionnaires to community pharmacists has indicated that response rates rarely exceed  
30 30%,<sup>20</sup> and online response rates are also extremely variable, therefore we feel that our  
31 choice of telephone administration is justified. The timing of administration was fortuitous  
32 as pharmacists appeared to have had sufficient time to reflect on how practice had changed  
33 over that time period. Attempting to administer the questionnaire at an earlier time point  
34 may have been difficult as pharmacists were still adjusting to new ways of working and  
35 coping with increased workload demands, which has been reported in other pharmacy  
36 studies.<sup>21</sup>  
37  
38  
39  
40  
41  
42  
43  
44  
45  
46  
47  
48  
49  
50

51  
52 The results from this study have provided a snapshot of how pharmacy practice changed  
53 over the early phases of the COVID-19 pandemic, with essential services being maintained,  
54 other services suspended, and new services being introduced. Pharmacies had to introduce  
55 measures to prevent the spread of infection and to protect their staff and became more  
56 involved in public health activities such as vaccination. Despite feeling unprepared during  
57  
58  
59  
60

1  
2  
3 the first wave, this improved with time. They maintained contact with GP colleagues and  
4 patients, accessed pandemic information sources, and were confident that they could  
5 continue to contribute to public health efforts through COVID vaccination and testing; the  
6 latter was borne out after the study was completed. It has been generally recognised that  
7 community pharmacy made an immense contribution to health care during the pandemic  
8 when many other services were not available to patients.<sup>4 22</sup> These findings need to inform  
9 ongoing and future planning for community pharmacy services, and especially in the context  
10 of another pandemic.<sup>23</sup> Public health measures need to be instigated quickly, along with  
11 prioritisation of essential services. It may be necessary to have access to additional staff to  
12 deal with the observed increase in workload, or redeploy from sectors that are not under  
13 immediate pressure (this was done to some extent using dentists). Careful attention needs  
14 to be given to the volume and consistency of key information to avoid confusion, with  
15 greater coordination.<sup>4 24</sup> Important lessons have been learned as to the pressures that  
16 community pharmacists have faced, and these must be integral to future planning and  
17 implementation of services in preparation for the next crisis. <sup>4 13 22</sup>

18  
19  
20  
21  
22  
23  
24  
25  
26  
27  
28  
29  
30  
31  
32  
33 **Acknowledgements:** The authors wish to acknowledge the contribution of the community  
34 pharmacists who participated in the study. We also wish to thank the members of the Study  
35 Advisory Group for their advice and support and those pharmacists who helped to pilot the  
36 questionnaire.  
37  
38  
39  
40

41  
42  
43  
44  
45  
46  
47  
48  
49  
50  
51  
52  
53  
54  
55  
56  
57  
58  
59  
60  
**Contributors:** Conception/design: CAC, HEB, KB, CMH; Acquisition, analysis or interpretation  
of the data: SMP, CAC, HEB, KB, CMH; Manuscript drafting, revision, approval: SMP, CAC,  
HEB, KB, CMH. Overall guarantors: CMH. The guarantor accepts full responsibility for the  
work and/or the conduct of the study, had access to the data and controlled the decision to  
publish.

**Funding:** This work was funded by the Health and Social Care Research and Development  
Division of the Public Health Agency, NI, under its COVID-19 Rapid Response Funding Call  
(Ref. No. COM/5601/20). The content or views expressed are those of the  
authors/presenters and do not necessarily reflect the official views of the HSC R&D Division.



1  
2  
3 **Competing interests:** None to declare  
4  
5

6  
7 **Patient consent for publication:** Not required  
8  
9

10 **Data availability statement:** Data are available upon reasonable request  
11  
12

13  
14 **Ethics statement:** This study received ethical approval from the Queen's University Belfast  
15 Faculty of Medicine, Health and Life Sciences Research Ethics Committee (Ref. No. MHLS  
16 21\_21).  
17  
18  
19

## 20 21 22 23 **REFERENCES**

- 24  
25 1. Cadogan CA, Hughes CM. On the frontline against COVID-19: Community  
26 pharmacists' contribution during a public health crisis. *Res Social Adm Pharm*  
27 2021;17:2032-2035
- 28  
29 2. Koster ES, Philbert D, Bouvy ML. Impact of the COVID-19 epidemic on the provision  
30 of pharmaceutical care in community pharmacies. *Res Social Adm Pharm*  
31 2021;17:2002-2004
- 32  
33 3. Costa S, Romao M, Mendes M, et al. Pharmacy interventions on COVID-19 in  
34 Europe: Mapping current practices and a scoping review. *Res Social Adm Pharm*  
35 [doi.org/10.1016/j.sapharm.2021.12.003](https://doi.org/10.1016/j.sapharm.2021.12.003)
- 36  
37 4. Bhamra SK, Parmar J, Heinrich M. Impact of the coronavirus pandemic (COVID-19)  
38 on the professional practice and personal well-being of community pharmacy teams  
39 in the UK. *Int J Pharm Pract* 2021;29:556-565
- 40  
41 5. Bahlol M, Dewey RS. Pandemic preparedness of community pharmacies for COVID-  
42 19 *Res Social Adm Pharm* 2021;17:1888-1896
- 43  
44 6. International Pharmaceutical Federation (FIP Health Advisory). Coronavirus 2019-  
45 nCoV Outbreak. Information and interim guidelines for pharmacists and the  
46 pharmacy workforce 2020 The Netherlands. Available from:  
47 [https://www.fip.org/files/content/priorityareas/coronavirus/Coronavirus-guidance-](https://www.fip.org/files/content/priorityareas/coronavirus/Coronavirus-guidance-update-ENGLISH.pdf)  
48 [update-ENGLISH.pdf](https://www.fip.org/files/content/priorityareas/coronavirus/Coronavirus-guidance-update-ENGLISH.pdf), [Accessed: February 21 2022]
- 49  
50 7. Alkhalili M, Ma J, Grenier S. Defining roles for pharmacy personnel in disaster  
51 response and emergency preparedness. *Disaster Med Public Health Prep*  
52 2017;11:496-504
- 53  
54 8. Barry HE, Cadogan CA, O'Reilly E, et al. Changes to community pharmacy practice  
55 during the COVID-19 pandemic: a cross-country documentary analysis. *Int J Pharm*  
56 *Pract* 2022;30(S1):i21-i22  
57  
58  
59  
60



- 1
  - 2
  - 3
  - 4
  - 5
  - 6
  - 7
  - 8
  - 9
  - 10
  - 11
  - 12
  - 13
  - 14
  - 15
  - 16
  - 17
  - 18
  - 19
  - 20
  - 21
  - 22
  - 23
  - 24
  - 25
  - 26
  - 27
  - 28
  - 29
  - 30
  - 31
  - 32
  - 33
  - 34
  - 35
  - 36
  - 37
  - 38
  - 39
  - 40
  - 41
  - 42
  - 43
  - 44
  - 45
  - 46
  - 47
  - 48
  - 49
  - 50
  - 51
  - 52
  - 53
  - 54
  - 55
  - 56
  - 57
  - 58
  - 59
  - 60
9. Zaidi STR, Hasan SS. Personal protective practices and pharmacy services delivery by community pharmacists during COVID-19 pandemic: results from a national study. *Res Social Adm Pharm* 2021;17:1832-1837
10. World Health Organisation. Maintaining Essential Health Services: Operational guidance for the COVID-19 context. Interim Guidance 1 June 2020. World Health Organisation, 2020. Available from: [https://www.who.int/publications/i/item/WHO-2019-nCoV-essential\\_health\\_services-2020.2](https://www.who.int/publications/i/item/WHO-2019-nCoV-essential_health_services-2020.2) [Accessed February 21 2022]
11. Visacri MB, Figueiredo IV, Lima TM. Role of pharmacist during the COVID-19 pandemic: A scoping review. *Res Social Adm Pharm* 2021;17:1799-1806
12. Wickware C. Pharmacies' dispensing increases by up to a third as a result of COVID-19, survey finds. *Pharm J* 2020;306:doi:10.1211/PJ.2020.20207917.
13. Romano S, Galante H, Figueira D, et al. Time-trend analysis of medicines sales and shortages during COVID-19 outbreak: data from community pharmacies. *Res Social Adm Pharm* 2021;17:1876-1881
14. Murphy M, Scott LJ, Salisbury C, et al. Implementation of remote consulting in UK primary care following the COVID-19 pandemic: a mixed-methods longitudinal study. *Br J Gen Pract* 2021;71:e166-e177
15. Carpenter DM, Hastings T, Westrick S, et al. Rural community pharmacies' preparedness for and responses to COVID-19. *Res Social Adm Pharm* 2021;17:1327-1331
16. Rosenquist JN. The stress of Bayesian medicine-uncomfortable uncertainty in the face of COVID-19. *New Engl J Med* 2021;384:7-9
17. Wickware C. Pharmacy leaders in 'urgent talks' with NHS as COVID-19 booster vaccination campaign is ramped up. *Pharm J* 2021;307:doi:10.1211/PJ.2021.1.12-231
18. Wickware C. Record numbers of lateral flow tests sent to pharmacies amid supply issues. *Pharm J* 2021;307:doi:10.1211/PJ.2021.1.121205
19. Wickware C. Community pharmacies fulfil 17 million lateral flow test requests, official data show. *Pharm J* 2022;308:doi:10.1211/PJ.2022.1.129133
20. Patton DE, Ryan C, Hughes CM. Enhancing community pharmacists' provision of medication adherence support to older adults: a mixed methods study using the Theoretical Domains Framework. *Res Social Adm Pharm* 2021;17:406-418
21. Austin Z, Gregory P. Resilience in the time of pandemic: the experience of community pharmacists during COVID-19. *Res Social Adm Pharm* 2021;17:1867-1875
22. Parkhurst C, Purewal GS, Donyai P. Community pharmacy and COVID-19-the unsung heroes on our high streets. *J Patient Exp* 2020;7:282-284
23. Maidment I, Young E, MacPhee M, et al. Rapid realist review of the role of community pharmacy in the public health response to COVID-19. *BMJ Open* 2021;11:e050043. doi:10.1136/bmjopen-2021-050043
24. Lloyd-Smith MK. The COVID-19 pandemic: resilient organisational response to a low-chance, high-impact event. *BMJ Leader* 2020;4:109-112

1  
2  
3  
4  
5  
6  
7  
8  
9  
10  
11  
12  
13  
14  
15  
16  
17  
18  
19  
20  
21  
22  
23  
24  
25  
26  
27  
28  
29  
30  
31  
32  
33  
34  
35  
36  
37  
38  
39  
40  
41  
42  
43  
44  
45  
46  
47  
48  
49  
50  
51  
52  
53  
54  
55  
56  
57  
58  
59  
60

For peer review only

1  
2  
3 **Figure legends**  
4  
5

6  
7 **Figure 1a Pharmacists' methods of**  
8 **communication with GP practices**  
9 **during the pandemic**  
10  
11

7 **Figure 1b Pharmacists' methods of**  
8 **communication with patients during the**  
9 **the pandemic**  
10  
11

12  
13  
14 **Figure 2 COVID-19 Information sources used by community pharmacists (n=130)**  
15

16 HSCNI and DoH: Advisory letters/emails were provided regularly by the Health and Social Care Board, the Department of  
17 Health and related agencies

18 Summarised information: Distilled information provided by the contractor/head office or a professional organisation e.g.  
19 Community Pharmacy NI, Pharmacy Forum

20 FAQs: Frequently Asked Questions updated daily on the Business Services Organisation (BSO) website

21 ECHO sessions: Online video sessions provided by Department of Health and Health & Social Care Board  
22

23 **Figure 3 Views of pharmacists (n=130) on selected post-pandemic activities**  
24  
25  
26  
27  
28  
29  
30  
31  
32  
33  
34  
35  
36  
37  
38  
39  
40  
41  
42  
43  
44  
45  
46  
47  
48  
49  
50  
51  
52  
53  
54  
55  
56  
57  
58  
59  
60

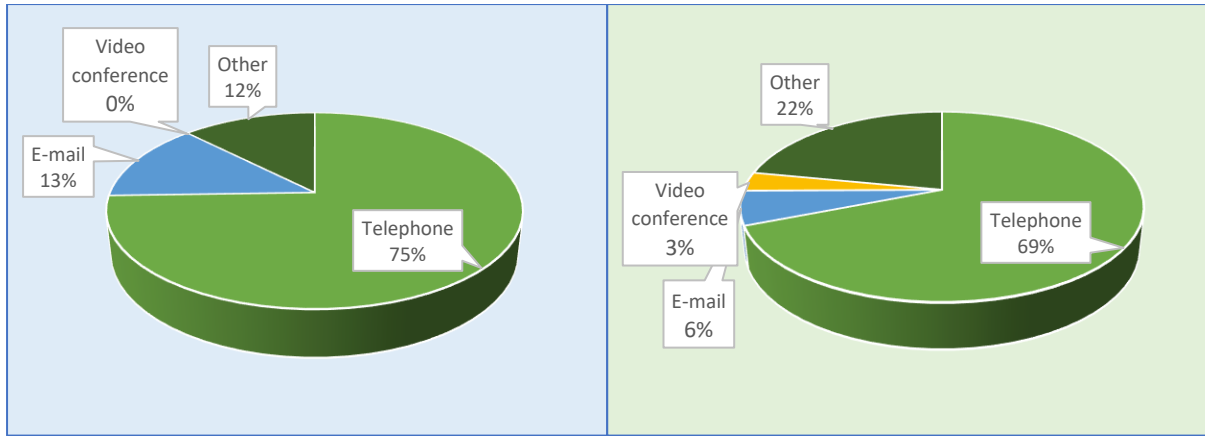

**Figure 1a Pharmacists' methods of communication with GP practices during the pandemic**

**Figure 1b Pharmacists' methods of communication with patients during the pandemic**

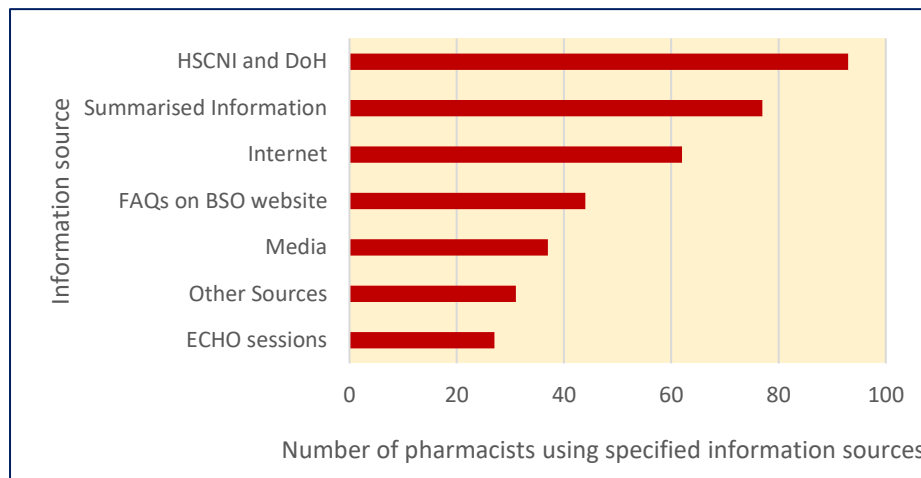

**Figure 2 COVID-19 Information sources used by community pharmacists (n=130)**

HSCNI and DoH: Advisory letters/emails were provided regularly by the Health and Social Care Board, the Department of Health and related agencies

Summarised information: Distilled information provided by the contractor/head office or a professional organisation e.g. Community Pharmacy NI, Pharmacy Forum

FAQs: Frequently Asked Questions updated daily on the Business Services Organisation (BSO) website

ECHO sessions: Online video sessions provided by Department of Health and Health & Social Care Board

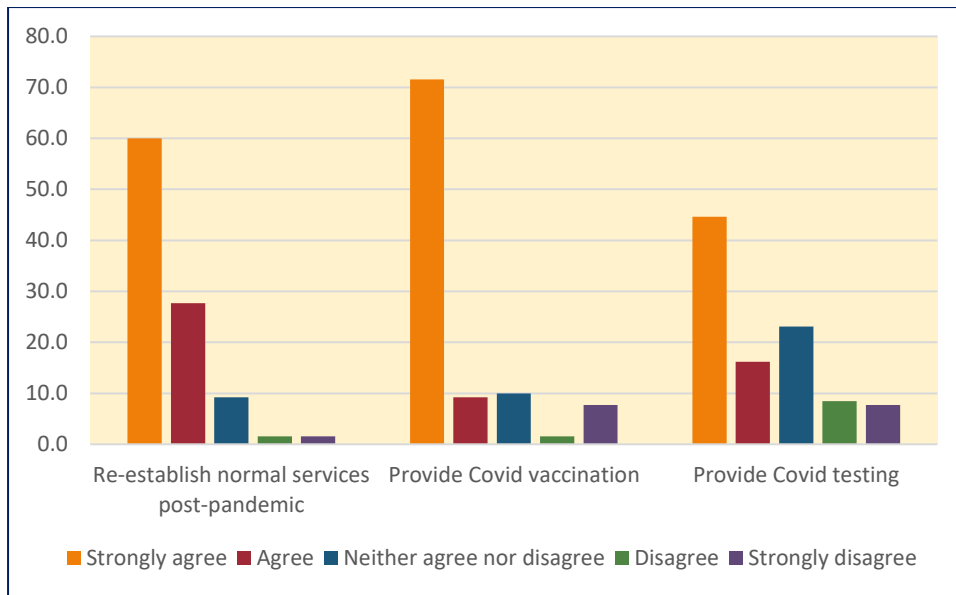

**Figure 3 Views of pharmacists (n=130) on selected post-pandemic activities**

Peer review only

## ----- Section 1: Introduction and Consent -----

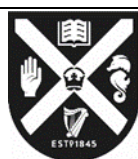**QUEEN'S  
UNIVERSITY  
BELFAST****Community Pharmacy COVID-19 Study: Telephone questionnaire**

**“A mixed methods study of the community pharmacy workforce’s preparedness for, and response to, the COVID-19 pandemic”**

**INTRODUCTION**

Hello, my name is Susan Patterson. I’m from the School of Pharmacy, Queen’s University Belfast and I’m a pharmacist undertaking a research study about community pharmacy’s preparedness for and response to the COVID-19 pandemic in Northern Ireland. I’m phoning to see if you might be interested in taking part in a short telephone questionnaire. The Pharmacy Forum and NPA recently circulated information about the study to all community pharmacists. Your experience of working in community pharmacy during the pandemic will be vitally important to help shape how community pharmacies prepare for any future pandemics or public health crises. Does this sound like something you would be interested in?

Yes No 

The questionnaire takes roughly 15 minutes and can be completed with me now or alternatively I can call back later at a time that suits you<sup>1</sup>.

**CONSENT**

Completion of this questionnaire is completely voluntary, and the results will be anonymous to anyone other than the research team who will treat all the information confidentially. You have the right to skip questions and to withdraw from the study, without giving a reason, at any time. If you withdraw, you can contact me on this phone number or at the School of Pharmacy and I will delete all data relating to you.

I will now read you a series of statements about the study which I would like you to respond to with either “Yes” or “No”. I will audio-record and note your responses on the telephone questionnaire form.

1. I confirm that I have read, or had read to me, and understand the information provided in advance by email for the study. I have had the opportunity to ask questions and these have been answered fully

---

<sup>1</sup> Suitable dates/times for call backs to be recorded by the researcher in a separate spreadsheet

## Community Pharmacy COVID-19 Study ID \_\_\_\_\_

Yes No 

2. I understand that my participation is voluntary and I am free to withdraw at any time, without giving any reason.

Yes No 

3. I understand the study is being conducted by researchers from Queen's University Belfast and that my personal information will be held securely on University premises and handled in accordance with the provisions of the Data Protection Act 2018.

Yes No 

4. I understand that data collected as part of this study may be looked at by authorized individuals from Queen's University Belfast, Trinity College Dublin and Royal College of Surgeons in Ireland) where it is relevant to my taking part in this research. I give permission for these individuals to have access to this information.

Yes No 

5. I agree to take part in the above study.

Yes No 

- **If the reply is No,**  
"Thank you for speaking to me today and goodbye".
- **If the reply is Yes,** proceed with completing the questionnaire.

**"In the interests of time, I will try to keep this as short as possible. Please help me by keeping your responses brief. If we are interrupted, can I call back later to finish it?"**

Yes No 

Suitable alternative times:

---

---

---



## Community Pharmacy COVID-19 Study ID \_\_\_\_\_

## ----- Section 2: Telephone Questionnaire -----

## PHARMACIST AND PHARMACY CHARACTERISTICS (DEMOGRAPHICS)

To begin, I will ask you some questions about you and the community pharmacy in which you work.

1. Pharmacist characteristics

## 1.1 Can I confirm the gender you identify as?

Female

Male

Prefer not to disclose

Other (please specify)

Other: \_\_\_\_\_

## 1.2 Which of the following categories includes your age?

&lt;25

25 - 34

35 - 44

45 - 54

55 - 64

≥65

## 1.3 How many years have you been practising as a pharmacist?

≤5

6 - 10

11 - 15

≥15

## 1.4 Are you the pharmacy owner (contractor) or an employee pharmacist?

Owner (contractor) Employee 1.5 What is your usual role in the pharmacy? Please choose one of the following:

Owner manager

Responsible pharmacist

Dispensary manager

Locum

Other (please specify)

Other: \_\_\_\_\_

## Community Pharmacy COVID-19 Study ID \_\_\_\_\_

1  
2  
3  
4 **1.6 Were you shielding during the early stages of the pandemic (approximately from**  
5 **March to May 2020)?**

6 Yes  No

7  
8  
9  
10 *[If the response is yes, researcher to discuss services in Questions 4 and 6 from the*  
11 *time period when the pharmacist returned to work (Question 5 refers only to*  
12 *June/July onwards)]*

13  
14  
15 **1.7 Are you on the temporary Pharmaceutical Register?**

16 Yes  No

17  
18  
19  
20  
21 **2. Community pharmacy characteristics**

22  
23  
24 **2.1 Researcher to record: Local Commissioning Group (LCG) (or Trust) Area:**

25  
26 Belfast Northern South Eastern Southern Western  
27  
28

29  
30  
31  
32 **2.2 Researcher to record: Location of the pharmacy:**

33  
34  
35  
36 Urban Rural Suburban  
37 (population >10,000) (population <5,000) (population of 5,000 – 10,000)  
38  
39

40  
41  
42  
43 **2.3 Which of the following options best describes the community pharmacy in which**  
44 **you work?**

45  
46 Independent   
47 Small chain (group of <5 pharmacies)   
48 Medium chain (group of 5-20 pharmacies)   
49 Large chain (group of >20 pharmacies)   
50  
51  
52  
53  
54  
55  
56  
57  
58  
59  
60

## Community Pharmacy COVID-19 Study ID \_\_\_\_\_

**A. PHARMACIST'S EXPERIENCE OF WORKING DURING THE PANDEMIC**

I will now ask you a series of questions about your experience of working during the pandemic. The questions are about what happened from March 2020 onwards and largely follow the sequence of events up to December 2020.

**PREVENTING THE SPREAD OF COVID-19**

This first set of questions deal with preventing the spread of COVID-19.

I would like you to think about March to May 2020 when answering these initial questions. I will read out a series of statements, and for each one, please respond with either Yes or No.

| 3. Part I<br>Did you have any of the following measures in place in your pharmacy between March and May 2020 to prevent the spread of COVID-19?                             | Part I                   | Part II                                                    |
|-----------------------------------------------------------------------------------------------------------------------------------------------------------------------------|--------------------------|------------------------------------------------------------|
|                                                                                                                                                                             | Yes (Y)/No (N)           | Measures stopped in June to August 2020?<br>Yes (Y)/No (N) |
| 3.1 Public health information on preventing COVID-19, e.g. posters, 'Living Well' campaign COVID booklet?                                                                   | <input type="checkbox"/> | <input type="checkbox"/>                                   |
| 3.2 Protocols for disinfection of pharmacy surfaces                                                                                                                         | <input type="checkbox"/> | <input type="checkbox"/>                                   |
| 3.3 Use of Personal Protective Equipment (PPE) by pharmacy staff, e.g. masks, gloves, aprons, eye protection                                                                | <input type="checkbox"/> | <input type="checkbox"/>                                   |
| 3.4 Management of social distancing, e.g. number of people in the shop, floor markings for queuing in the pharmacy                                                          | <input type="checkbox"/> | <input type="checkbox"/>                                   |
| 3.5 Shorter opening hours to facilitate cleaning, re-stocking, staff breaks                                                                                                 | <input type="checkbox"/> | <input type="checkbox"/>                                   |
| 3.6 Lunchtime closing                                                                                                                                                       | <input type="checkbox"/> | <input type="checkbox"/>                                   |
| 3.7 Changes to how your available space was used, e.g. using consultation room for staff breaks                                                                             | <input type="checkbox"/> | <input type="checkbox"/>                                   |
| 3.8 Adjustments to premises, e.g. physical barriers at counters in pharmacies, screens, partitions                                                                          | <input type="checkbox"/> | <input type="checkbox"/>                                   |
| 3.9 Reduced opportunity for face-to-face contact, e.g. temporary suspension of direct patient care services                                                                 | <input type="checkbox"/> | <input type="checkbox"/>                                   |
| 3.10 Changes to staff working patterns to facilitate social distancing                                                                                                      | <input type="checkbox"/> | <input type="checkbox"/>                                   |
| <b>Part II</b><br><b>And did you stop any of these at a later date, for example, during June to August 2020?</b><br><i>[Record Yes (Y)/No (N) in 2<sup>nd</sup> column]</i> |                          |                                                            |

**3.12 Were there any other measures put in place in your pharmacy to prevent the spread of COVID-19 that you would like to mention?**

*[document free-text response]*

---



---



---



---

**Community Pharmacy COVID-19 Study ID \_\_\_\_\_**

**PHARMACY SERVICES**

The next set of questions focuses on your experience of the immediate actions taken in relation to community pharmacy services in response to the pandemic over time up to the end of December 2020.

I will ask you about each pharmacy service in turn, and I would like to think about how you responded initially and if anything changed over time. Again, please provide Yes or No responses or state “not applicable” if you don’t usually provide the service.

| 4. <u>Part I</u><br>Did you have to <u>stop</u> providing any of the following services during March-May 2020 (first wave)? If so, did you <u>restart</u> during June-August? (after 1 <sup>st</sup> wave). | Part I                                                                     |                                        |                                                                                  | Part II                                                                   |
|-------------------------------------------------------------------------------------------------------------------------------------------------------------------------------------------------------------|----------------------------------------------------------------------------|----------------------------------------|----------------------------------------------------------------------------------|---------------------------------------------------------------------------|
|                                                                                                                                                                                                             | Service provision stopped during March-May 2020 (Wave 1)<br>Yes (Y)/No (N) | N/A<br>Service is not usually provided | If stopped, Re-started by pharmacy Jun-Aug 2020 (after Wave 1)<br>Yes (Y)/No (N) | Service provision stopped during Sept-Dec 2020 (Wave 2)<br>Yes (Y)/No (N) |
| 4.1 Dispensing acute and repeat (chronic) medicines                                                                                                                                                         |                                                                            |                                        |                                                                                  |                                                                           |
| 4.2 Supply of OTC medicines                                                                                                                                                                                 |                                                                            |                                        |                                                                                  |                                                                           |
| 4.3 Medicines advice to patients                                                                                                                                                                            |                                                                            |                                        |                                                                                  |                                                                           |
| 4.4 #Living Well campaigns                                                                                                                                                                                  |                                                                            |                                        |                                                                                  |                                                                           |
| 4.5 Nursing/residential homes’ support and advice                                                                                                                                                           |                                                                            |                                        |                                                                                  |                                                                           |
| 4.6 Dispensing of out-of-hours prescriptions                                                                                                                                                                |                                                                            |                                        |                                                                                  |                                                                           |

Community Pharmacy COVID-19 Study ID \_\_\_\_\_

| Question 4 continued.....                                                                                                                                                                                | Part I                                                                  |                                        |                                                                               | Part II                                                                |
|----------------------------------------------------------------------------------------------------------------------------------------------------------------------------------------------------------|-------------------------------------------------------------------------|----------------------------------------|-------------------------------------------------------------------------------|------------------------------------------------------------------------|
| <b>Part I</b><br>Did you have to <u>stop</u> providing any of the following services during March-May 2020 (first wave)? If so, did you <u>restart</u> during June-August? (after 1 <sup>st</sup> wave). | Service provision stopped during March-May 2020 (Wave 1) Yes (Y)/No (N) | N/A<br>Service is not usually provided | If stopped, Re-started by pharmacy Jun-Aug 2020 (after Wave 1) Yes (Y)/No (N) | Service provision stopped during Sept-Dec 2020 (Wave 2) Yes (Y)/No (N) |
| 4.7 Prescription collection*                                                                                                                                                                             |                                                                         |                                        |                                                                               |                                                                        |
| 4.8 Prescription delivery service*                                                                                                                                                                       |                                                                         |                                        |                                                                               |                                                                        |
| 4.9 #Minor Ailments Scheme/ Pharmacy First                                                                                                                                                               |                                                                         |                                        |                                                                               |                                                                        |
| 4.10 #Medicines Use Review                                                                                                                                                                               |                                                                         |                                        |                                                                               |                                                                        |
| 4.11 #Managing Your Medicines                                                                                                                                                                            |                                                                         |                                        |                                                                               |                                                                        |
| 4.12 #Smoking Cessation                                                                                                                                                                                  |                                                                         |                                        |                                                                               |                                                                        |
| 4.13 Adherence support (e.g. weekly dispensing)                                                                                                                                                          |                                                                         |                                        |                                                                               |                                                                        |
| 4.14 #Supervision of Opioid Substitution Treatment*                                                                                                                                                      |                                                                         |                                        |                                                                               |                                                                        |
| 4.15 Needle and syringe exchange service*                                                                                                                                                                |                                                                         |                                        |                                                                               |                                                                        |
| 4.16 Travel Vaccination                                                                                                                                                                                  |                                                                         |                                        |                                                                               |                                                                        |
| 4.17 Any others? Please specify: _____                                                                                                                                                                   |                                                                         |                                        |                                                                               |                                                                        |

\*If usually provided by your pharmacy #Stood down by HSCB during March-May 2020

**Part II** [On completion of Part 1 above, list services again and add responses to table above]  
Did you have to stop providing any services again during Sep-Dec (the 2<sup>nd</sup> wave)? Which ones?

**Community Pharmacy COVID-19 Study ID \_\_\_\_\_**

**During the pandemic, a number of new services were commissioned; many pharmacies also developed new and innovative ways of working.**

| <b>5 Part I</b><br><b>Did you implement any of the following new ways of working in response to COVID-19 between March and May 2020 (Wave 1)?</b> | <b>Part I</b><br><b>Yes (Y)/No (N)</b>                            | <b>Part II</b><br><b>Stopped at a later date?</b><br><b>Yes (Y)/No (N)</b> |
|---------------------------------------------------------------------------------------------------------------------------------------------------|-------------------------------------------------------------------|----------------------------------------------------------------------------|
|                                                                                                                                                   | 5.1 Community Pharmacy Emergency Supply during a Pandemic service | <input type="checkbox"/>                                                   |
| 5.2 Prescription delivery services by volunteers                                                                                                  | <input type="checkbox"/>                                          | <input type="checkbox"/>                                                   |
| 5.3 Replenishment of Care Home Pandemic packs                                                                                                     | <input type="checkbox"/>                                          | <input type="checkbox"/>                                                   |
| 5.4 Palliative care on-call services                                                                                                              | <input type="checkbox"/>                                          | <input type="checkbox"/>                                                   |
| 5.5 Employment of additional staff, e.g. dentists, volunteers, undergraduate students, retired pharmacists                                        | <input type="checkbox"/>                                          | <input type="checkbox"/>                                                   |
| 5.6 Flu vaccination service (frontline Health and Social Care workers)                                                                            | <input type="checkbox"/>                                          | <input type="checkbox"/>                                                   |
| 5.7 Supply of medicines usually supplied in the hospital setting (e.g. oncology, antiretroviral drugs, 'Healthcare at Home')                      | <input type="checkbox"/>                                          | <input type="checkbox"/>                                                   |
| 5.8 Measures to flag/assist patients with sensitive issues such as domestic violence reporting                                                    | <input type="checkbox"/>                                          | <input type="checkbox"/>                                                   |
| 5.9 Drive-through pharmacy services (initiated or increased)                                                                                      | <input type="checkbox"/>                                          | <input type="checkbox"/>                                                   |
| 5.10 Daily reporting of staffing/stock situation to the Health and Social Care Board                                                              | <input type="checkbox"/>                                          | <input type="checkbox"/>                                                   |
| 5.11 Referrals to Test and Trace services                                                                                                         | <input type="checkbox"/>                                          | <input type="checkbox"/>                                                   |
| 5.12 Commissioned Prescription delivery service (starting Sept 2020)                                                                              | <input type="checkbox"/>                                          | <input type="checkbox"/>                                                   |
| 5.13 Any others? Please specify:<br><hr/> <hr/> <hr/>                                                                                             |                                                                   |                                                                            |
| <b>Part II</b><br><b>And did you stop any of these afterwards at a later date?</b><br><i>[Record Y/N Yes (Y)/No (N) in 2<sup>nd</sup> column]</i> |                                                                   |                                                                            |

Community Pharmacy COVID-19 Study ID \_\_\_\_\_

PREPAREDNESS

Having now had the experience of working during the pandemic, I'd like to ask you to reflect on how well prepared you felt you were.

| 6. Thinking back to the start of the initial outbreak of COVID-19 firstly in March-May 2020 and secondly in Sept-Dec 2020, did you have... | March - May 2020<br>(beginning of Wave 1)<br>Yes (Y)/No (N) | Sept - Dec 2020<br>(beginning of Wave 2)<br>Yes (Y)/No (N) |
|--------------------------------------------------------------------------------------------------------------------------------------------|-------------------------------------------------------------|------------------------------------------------------------|
| 6.1 A business continuity plan in place for use in the event of staff absence over a prolonged period?                                     | <input type="checkbox"/>                                    | <input type="checkbox"/>                                   |
| 6.2 A business continuity plan in place for use in the event of pharmacy closure?                                                          | <input type="checkbox"/>                                    | <input type="checkbox"/>                                   |
| 6.3 Enough stock and supply of essential prescription and OTC medicines?                                                                   | <input type="checkbox"/>                                    | <input type="checkbox"/>                                   |
| 6.4 Enough financial resources to cover the additional demands on your pharmacy business                                                   | <input type="checkbox"/>                                    | <input type="checkbox"/>                                   |
| 6.5 Enough stock and supply of hand sanitisers                                                                                             | <input type="checkbox"/>                                    | <input type="checkbox"/>                                   |
| 6.6 Enough <u>information</u> about PPE requirements for staff                                                                             | <input type="checkbox"/>                                    | <input type="checkbox"/>                                   |
| 6.7 Enough <u>supply</u> of PPE for staff                                                                                                  | <input type="checkbox"/>                                    | <input type="checkbox"/>                                   |
| 6.8 A system to manage quantity limits for patients for the supply of individual medicines                                                 | <input type="checkbox"/>                                    | <input type="checkbox"/>                                   |
| 6.9 Appropriate staff working patterns in place                                                                                            | <input type="checkbox"/>                                    | <input type="checkbox"/>                                   |
| 6.10 Did you have to close the pharmacy at any stage during the pandemic?                                                                  | <input type="checkbox"/>                                    | <input type="checkbox"/>                                   |
| 6.11 And if so, for how long?<br><i>[document free text response]</i>                                                                      |                                                             |                                                            |

1  
2  
3  
4  
5  
6  
7  
8  
9  
10  
11  
12  
13  
14  
15  
16  
17  
18  
19  
20  
21  
22  
23  
24  
25  
26  
27  
28  
29  
30  
31  
32  
33  
34  
35  
36  
37  
38  
39  
40  
41  
42  
43  
44  
45  
46  
47  
48  
49  
50  
51  
52  
53  
54  
55  
56  
57  
58  
59  
60

**Community Pharmacy COVID-19 Study ID \_\_\_\_\_**

**7.1** What single aspect of your work, if any, did you feel **MOST** prepared for during March to May 2020 (Wave 1)?

---



---

**7.2** What single aspect of your work, if any, did you feel **LEAST** prepared for during March to May 2020 (Wave 1)?

---



---

|                                                                                                                                            |                          |                          |
|--------------------------------------------------------------------------------------------------------------------------------------------|--------------------------|--------------------------|
| <b>7.3</b> Overall, did you feel better or worse prepared for working during Wave 2 in Sept-Dec 2020 compared to Wave 1 in March-May 2020? | <b>Better prepared</b>   | <b>Worse prepared</b>    |
|                                                                                                                                            | <input type="checkbox"/> | <input type="checkbox"/> |

**7.4** If worse, can you briefly explain why?

---



---



---

**COMMUNICATION**

Now I'd like you to think about how you were able to communicate with others during the pandemic.

|                                                                                                                                                                                                                                                                                                                       |                                                                                                                                                                                                                                                                                                                            |                          |
|-----------------------------------------------------------------------------------------------------------------------------------------------------------------------------------------------------------------------------------------------------------------------------------------------------------------------|----------------------------------------------------------------------------------------------------------------------------------------------------------------------------------------------------------------------------------------------------------------------------------------------------------------------------|--------------------------|
|                                                                                                                                                                                                                                                                                                                       | <b>Yes</b>                                                                                                                                                                                                                                                                                                                 | <b>No</b>                |
| <b>8.1</b> Did you communicate differently with GPs and patients during the pandemic?                                                                                                                                                                                                                                 | <input type="checkbox"/>                                                                                                                                                                                                                                                                                                   | <input type="checkbox"/> |
| <b>How did you communicate?</b>                                                                                                                                                                                                                                                                                       |                                                                                                                                                                                                                                                                                                                            |                          |
| <p><b>8.2 GPs</b></p> <p style="text-align: right;">Telephone <input type="checkbox"/></p> <p style="text-align: right;">E-mail <input type="checkbox"/></p> <p style="text-align: right;">Video call <input type="checkbox"/></p> <p style="text-align: right;">Other <input type="checkbox"/></p> <hr/> <hr/> <hr/> | <p><b>8.3 Patients</b></p> <p style="text-align: right;">Telephone <input type="checkbox"/></p> <p style="text-align: right;">E-mail <input type="checkbox"/></p> <p style="text-align: right;">Video call <input type="checkbox"/></p> <p style="text-align: right;">Other <input type="checkbox"/></p> <hr/> <hr/> <hr/> |                          |

**UPDATING PROFESSIONAL KNOWLEDGE**



## Community Pharmacy COVID-19 Study ID \_\_\_\_\_

This question is about keeping your clinical knowledge of COVID-19 up to date.

|                                                                                    | Yes<br><input type="checkbox"/> | No<br><input type="checkbox"/> |
|------------------------------------------------------------------------------------|---------------------------------|--------------------------------|
| <b>9.1 Were sufficient training resources available to you?</b>                    |                                 |                                |
| <b>9.2 What resources did you use? Tick all that apply</b>                         |                                 |                                |
| Remote training (ECHO) sessions                                                    | <input type="checkbox"/>        |                                |
| Frequently Asked Questions for community pharmacists on the BSO website            | <input type="checkbox"/>        |                                |
| Distilled / summarised information sources provided by CPNI, NPA or your employer  | <input type="checkbox"/>        |                                |
| Internet                                                                           | <input type="checkbox"/>        |                                |
| Media                                                                              | <input type="checkbox"/>        |                                |
| Dept of Health, Health & Social Care Board, Public Health Agency COVID-19 guidance | <input type="checkbox"/>        |                                |
| Other, please specify                                                              | <input type="checkbox"/>        |                                |
| <hr/>                                                                              |                                 |                                |
| <hr/>                                                                              |                                 |                                |

### LOOKING TO THE FUTURE

The final few questions will focus on your views about returning to normal activities post-pandemic. On a scale of 1-5 where 1= strongly agree and 5= strongly disagree, please indicate your level of agreement with the following statements:

| <b>10.1 I am confident that I will be able to re-establish normal patient care services post-pandemic</b> |       |                            |          |                   |
|-----------------------------------------------------------------------------------------------------------|-------|----------------------------|----------|-------------------|
| Strongly agree                                                                                            | Agree | Neither agree nor disagree | Disagree | Strongly disagree |
| 1                                                                                                         | 2     | 3                          | 4        | 5                 |

| <b>10.2 I am willing to provide and administer COVID-19 vaccinations when they are available through community pharmacies in N. Ireland</b> |       |                            |          |                   |
|---------------------------------------------------------------------------------------------------------------------------------------------|-------|----------------------------|----------|-------------------|
| Strongly agree                                                                                                                              | Agree | Neither agree nor disagree | Disagree | Strongly disagree |
| 1                                                                                                                                           | 2     | 3                          | 4        | 5                 |

| <b>10.3 I am willing to provide COVID-19 testing within the pharmacy if available in the future</b> |       |                            |          |                   |
|-----------------------------------------------------------------------------------------------------|-------|----------------------------|----------|-------------------|
| Strongly agree                                                                                      | Agree | Neither agree nor disagree | Disagree | Strongly disagree |
| 1                                                                                                   | 2     | 3                          | 4        | 5                 |

Community Pharmacy COVID-19 Study ID \_\_\_\_\_

1  
2  
3  
4  
5  
6  
7  
8  
9  
10  
11  
12  
13  
14  
15  
16  
17  
18  
19  
20  
21  
22  
23  
24  
25  
26  
27  
28  
29  
30  
31  
32  
33  
34  
35  
36  
37  
38  
39  
40  
41  
42  
43  
44  
45  
46  
47  
48  
49  
50  
51  
52  
53  
54  
55  
56  
57  
58  
59  
60

----- Blank Page -----

For peer review only

## Community Pharmacy COVID-19 Study ID \_\_\_\_\_

## ----- Section 3: Conclusion and Interview Information -----

**CONCLUSION Thank you for participating & information about participation in a future interview**

- Thank you very much for taking the time to answer these questions. Your responses will provide a very helpful insight into how community pharmacy has responded to the pandemic.
- This questionnaire is part of a larger study about community pharmacy and COVID-19. In the next stage, we plan to invite a range of key stakeholders to take part in interviews to explore, in more depth, the role of community pharmacists over the course of the pandemic. The interview will last about 40 minutes. If you think you might be willing to be interviewed, I can send you further information about what this will entail. Please be assured that by requesting information you are not committing to take part. Would you like more information about the study?

Yes No 

- **If the reply is yes,**

Could you provide me with your contact details?

- Name: \_\_\_\_\_
- E-mail address: \_\_\_\_\_
- Telephone number: \_\_\_\_\_

- **If the reply is no, thanks again for your time and goodbye.**

**STROBE 2007 (v4) Statement—Checklist of items that should be included in reports of *cross-sectional studies***

| Section/Topic                | Item # | Recommendation                                                                                                                                                                       | Reported on page # |
|------------------------------|--------|--------------------------------------------------------------------------------------------------------------------------------------------------------------------------------------|--------------------|
| <b>Title and abstract</b>    | 1      | (a) Indicate the study's design with a commonly used term in the title or the abstract                                                                                               | 1 and 2            |
|                              |        | (b) Provide in the abstract an informative and balanced summary of what was done and what was found                                                                                  | 2                  |
| <b>Introduction</b>          |        |                                                                                                                                                                                      |                    |
| Background/rationale         | 2      | Explain the scientific background and rationale for the investigation being reported                                                                                                 | 4                  |
| Objectives                   | 3      | State specific objectives, including any prespecified hypotheses                                                                                                                     | 4                  |
| <b>Methods</b>               |        |                                                                                                                                                                                      |                    |
| Study design                 | 4      | Present key elements of study design early in the paper                                                                                                                              | 4                  |
| Setting                      | 5      | Describe the setting, locations, and relevant dates, including periods of recruitment, exposure, follow-up, and data collection                                                      | 4, 6, 7            |
| Participants                 | 6      | (a) Give the eligibility criteria, and the sources and methods of selection of participants                                                                                          | 5, 6               |
| Variables                    | 7      | Clearly define all outcomes, exposures, predictors, potential confounders, and effect modifiers. Give diagnostic criteria, if applicable                                             | 5                  |
| Data sources/<br>measurement | 8*     | For each variable of interest, give sources of data and details of methods of assessment (measurement). Describe comparability of assessment methods if there is more than one group | 5                  |
| Bias                         | 9      | Describe any efforts to address potential sources of bias                                                                                                                            | 5, 6               |
| Study size                   | 10     | Explain how the study size was arrived at                                                                                                                                            | 5, 6               |
| Quantitative variables       | 11     | Explain how quantitative variables were handled in the analyses. If applicable, describe which groupings were chosen and why                                                         | 7                  |
| Statistical methods          | 12     | (a) Describe all statistical methods, including those used to control for confounding                                                                                                | 7                  |
|                              |        | (b) Describe any methods used to examine subgroups and interactions                                                                                                                  | N/A                |
|                              |        | (c) Explain how missing data were addressed                                                                                                                                          | N/A                |
|                              |        | (d) If applicable, describe analytical methods taking account of sampling strategy                                                                                                   | N/A                |
|                              |        | (e) Describe any sensitivity analyses                                                                                                                                                | N/A                |
| <b>Results</b>               |        |                                                                                                                                                                                      |                    |

|                          |     |                                                                                                                                                                                                              |                         |
|--------------------------|-----|--------------------------------------------------------------------------------------------------------------------------------------------------------------------------------------------------------------|-------------------------|
| Participants             | 13* | (a) Report numbers of individuals at each stage of study—eg numbers potentially eligible, examined for eligibility, confirmed eligible, included in the study, completing follow-up, and analysed            | 7, 8 (Table 1)          |
|                          |     | (b) Give reasons for non-participation at each stage                                                                                                                                                         | N/A                     |
|                          |     | (c) Consider use of a flow diagram                                                                                                                                                                           | N/A                     |
| Descriptive data         | 14* | (a) Give characteristics of study participants (eg demographic, clinical, social) and information on exposures and potential confounders                                                                     | 8 (Table 1 and Table 2) |
|                          |     | (b) Indicate number of participants with missing data for each variable of interest                                                                                                                          | N/A                     |
| Outcome data             | 15* | Report numbers of outcome events or summary measures                                                                                                                                                         | Tables 3-5; Figs 1-3    |
| Main results             | 16  | (a) Give unadjusted estimates and, if applicable, confounder-adjusted estimates and their precision (eg, 95% confidence interval). Make clear which confounders were adjusted for and why they were included | N/A                     |
|                          |     | (b) Report category boundaries when continuous variables were categorized                                                                                                                                    | N/A                     |
|                          |     | (c) If relevant, consider translating estimates of relative risk into absolute risk for a meaningful time period                                                                                             | N/A                     |
| Other analyses           | 17  | Report other analyses done—eg analyses of subgroups and interactions, and sensitivity analyses                                                                                                               | N/A                     |
| <b>Discussion</b>        |     |                                                                                                                                                                                                              |                         |
| Key results              | 18  | Summarise key results with reference to study objectives                                                                                                                                                     | 17                      |
| Limitations              | 19  | Discuss limitations of the study, taking into account sources of potential bias or imprecision. Discuss both direction and magnitude of any potential bias                                                   | 19                      |
| Interpretation           | 20  | Give a cautious overall interpretation of results considering objectives, limitations, multiplicity of analyses, results from similar studies, and other relevant evidence                                   | 17-20                   |
| Generalisability         | 21  | Discuss the generalisability (external validity) of the study results                                                                                                                                        | 19                      |
| <b>Other information</b> |     |                                                                                                                                                                                                              |                         |
| Funding                  | 22  | Give the source of funding and the role of the funders for the present study and, if applicable, for the original study on which the present article is based                                                | 20                      |

\*Give information separately for cases and controls in case-control studies and, if applicable, for exposed and unexposed groups in cohort and cross-sectional studies.

**Note:** An Explanation and Elaboration article discusses each checklist item and gives methodological background and published examples of transparent reporting. The STROBE checklist is best used in conjunction with this article (freely available on the Web sites of PLoS Medicine at <http://www.plosmedicine.org/>, Annals of Internal Medicine at <http://www.annals.org/>, and Epidemiology at <http://www.epidem.com/>). Information on the STROBE Initiative is available at [www.strobe-statement.org](http://www.strobe-statement.org).

# BMJ Open

**A cross-sectional questionnaire study of the experiences of community pharmacists in Northern Ireland during the early phases of the COVID-19 pandemic: preparation, experience and response**

|                                 |                                                                                                                                                                                                                                                                                                                              |
|---------------------------------|------------------------------------------------------------------------------------------------------------------------------------------------------------------------------------------------------------------------------------------------------------------------------------------------------------------------------|
| Journal:                        | <i>BMJ Open</i>                                                                                                                                                                                                                                                                                                              |
| Manuscript ID                   | bmjopen-2022-064545.R1                                                                                                                                                                                                                                                                                                       |
| Article Type:                   | Original research                                                                                                                                                                                                                                                                                                            |
| Date Submitted by the Author:   | 05-Jul-2022                                                                                                                                                                                                                                                                                                                  |
| Complete List of Authors:       | Patterson, Susan M.; Queen's University Belfast Cadogan, Cathal; Trinity College Dublin, Pharmacy<br>Barry, Heather; Queen's University Belfast, School of Pharmacy<br>Bennett, Kathleen; Royal College of Surgeons in Ireland, Population Health Sciences<br>Hughes, Carmel; Queen's University Belfast, School of Pharmacy |
| <b>Primary Subject Heading</b>: | Health services research                                                                                                                                                                                                                                                                                                     |
| Secondary Subject Heading:      | General practice / Family practice                                                                                                                                                                                                                                                                                           |
| Keywords:                       | COVID-19, Quality in health care < HEALTH SERVICES ADMINISTRATION & MANAGEMENT, PRIMARY CARE                                                                                                                                                                                                                                 |
|                                 |                                                                                                                                                                                                                                                                                                                              |

SCHOLARONE™  
Manuscripts



I, the Submitting Author has the right to grant and does grant on behalf of all authors of the Work (as defined in the below author licence), an exclusive licence and/or a non-exclusive licence for contributions from authors who are: i) UK Crown employees; ii) where BMJ has agreed a CC-BY licence shall apply, and/or iii) in accordance with the terms applicable for US Federal Government officers or employees acting as part of their official duties; on a worldwide, perpetual, irrevocable, royalty-free basis to BMJ Publishing Group Ltd ("BMJ") its licensees and where the relevant Journal is co-owned by BMJ to the co-owners of the Journal, to publish the Work in this journal and any other BMJ products and to exploit all rights, as set out in our [licence](#).

The Submitting Author accepts and understands that any supply made under these terms is made by BMJ to the Submitting Author unless you are acting as an employee on behalf of your employer or a postgraduate student of an affiliated institution which is paying any applicable article publishing charge ("APC") for Open Access articles. Where the Submitting Author wishes to make the Work available on an Open Access basis (and intends to pay the relevant APC), the terms of reuse of such Open Access shall be governed by a Creative Commons licence – details of these licences and which [Creative Commons](#) licence will apply to this Work are set out in our licence referred to above.

Other than as permitted in any relevant BMJ Author's Self Archiving Policies, I confirm this Work has not been accepted for publication elsewhere, is not being considered for publication elsewhere and does not duplicate material already published. I confirm all authors consent to publication of this Work and authorise the granting of this licence.

1  
2  
3 **A cross-sectional questionnaire study of the experiences of community pharmacists in**  
4 **Northern Ireland during the early phases of the COVID-19 pandemic: preparation,**  
5 **experience and response**  
6

7  
8 Susan M. Patterson<sup>1</sup>, Cathal A. Cadogan<sup>2</sup>, Heather E. Barry<sup>1</sup>, Kathleen Bennett<sup>3</sup>, Carmel M.  
9 Hughes<sup>1\*</sup>  
10

11 <sup>1</sup>School of Pharmacy, Queen's University Belfast  
12

13 <sup>2</sup>School of Pharmacy and Pharmaceutical Sciences, Trinity College Dublin  
14

15 <sup>3</sup>Data Science Centre, School of Population Health, Royal College of Surgeons in Ireland,  
16 Dublin  
17

18  
19  
20 \*Author for correspondence; Carmel M. Hughes, School of Pharmacy, Queen's University  
21 Belfast, 97 Lisburn Road, Belfast, BT9 7BL, Northern Ireland. Email: c.hughes@qub.ac.uk  
22  
23  
24  
25  
26  
27  
28  
29  
30  
31  
32  
33  
34  
35  
36  
37  
38  
39  
40  
41  
42  
43  
44  
45  
46  
47  
48  
49  
50  
51  
52  
53  
54  
55  
56  
57  
58  
59  
60



## ABSTRACT

**Objectives:** To examine the views and experiences of community pharmacists in Northern Ireland (NI) regarding changes in community pharmacy practice/processes in preparation for, and response to, the COVID-19 pandemic.

**Design:** Cross-sectional telephone-administered questionnaire.

**Setting and participants:** Geographically stratified representative sample of 130 community pharmacists in NI between March and May 2021.

**Outcome measures:** Community pharmacists' responses to questions focusing on their preparation, experience and response to the COVID-19 pandemic. Descriptive analysis was conducted including frequencies and percentages. Free-text comments were summarised using thematic analysis.

**Results:** One hundred and thirty pharmacists completed the questionnaire. Pharmacists responded comprehensively to implementing infection control measures, e.g. management of social distancing in the shop (96.2%), making adjustments to premises, e.g. barriers/screens (95.4%), while maintaining medicines supply (100.0%) and advice to patients (93.1%). Newly commissioned services were provided, e.g. emergency supply service (93.1%), flu vaccination for healthcare workers (77.7%) and volunteer deliveries to vulnerable people (54.6%). Pharmacists were least prepared for the increased workload and patients' challenging behaviour, but the majority (96.9%) reported that they felt better prepared during the second wave. Pharmacists agreed/strongly agreed that they would be able to re-establish normal services (87.7%), were willing to administer COVID-19 vaccines (80.7%) and provide COVID-19 testing (60.8%) in the future.

**Conclusions:** Community pharmacists remained accessible and maintained supply of essential medicines and advice to patients throughout the pandemic. Provision of modified and additional services such as vaccination reinforced the clinical and public health role of pharmacy

### Strengths and limitations of this study

- Large representative sample of community pharmacists attained
- Method of questionnaire administration ensured there was very little missing data
- Focus on Northern Ireland making the results less generalisable

- Method of questionnaire administration limited the number of pharmacists who could be contacted due to time and resource constraints

For peer review only

## INTRODUCTION

Since March 2020, healthcare provision has faced one of its greatest challenges in responding to the COVID-19 pandemic. Health services have been under immense pressure to provide information, prevent and manage COVID infection, and deal with the long-term sequelae of infection, while trying to maintain care for other patients with acute and long-term conditions. Community pharmacy is one of the most accessible health sectors and has played a vital frontline role during key stages of the current COVID-19 pandemic (i.e. prevention, preparedness, response, recovery).<sup>[1] [2] [3] [4]</sup> However, community pharmacy had to markedly adapt its usual working practices.

Community pharmacies typically provide a wide range of core services (e.g. dispensing, supply of over the counter medication, health promotion activities), with some providing locally commissioned services (e.g. smoking cessation) that are delivered by choice or driven by local need. At the outset of the pandemic, the commissioners stood down a number of additional patient-facing services, e.g. Medicines Use Reviews (MURs); some of these were reintroduced at a later date, e.g. Minor Ailments and Smoking Cessation (September 2020) with appropriate COVID-safe modifications. Most of the non-core services were stood down during March-May 2020, with the notable exception of needle and syringe exchange services (NSES) which were modified to reduce the COVID-19 transmission risk.<sup>[5]</sup>

Amid the restrictions imposed following the onset of the pandemic, community pharmacy was deemed an essential service which reflects the importance of medicine-taking in everyday life,<sup>[6]</sup> especially at a time when other services were not readily accessible.<sup>[2],[4]</sup> Governments and professional organisations in various countries have specifically acknowledged the need to support and maximise pharmacy as a resource in maintaining delivery of patient care.<sup>[7]</sup>

As society begins to emerge from the worst of the pandemic, it is important to learn from the experience so that health services can appropriately prepare for the next pandemic or emergency health crisis. This requires a consideration of the experiences of healthcare professionals who have worked during COVID-19. A three-phase research project was undertaken in Northern Ireland (NI) to assess community pharmacy's preparedness for and

1  
2  
3 response to the pandemic, using Donabedian's over-arching three-pillar model of quality of  
4 care: structure, process and outcome.<sup>[8]</sup> Phase 1 (representing structure) was a  
5 documentary analysis of guidance and policy documents released over the initial months of  
6 the pandemic,<sup>[5]</sup> this current paper describes the findings of a telephone-administered  
7 questionnaire with community pharmacist participants (Phase 2, process) while Phase 3 was  
8 a series of semi-structured interviews with community pharmacists and key stakeholders  
9 (outcomes).<sup>[9]</sup> The aim of this present study was to examine the immediate views and  
10 experiences of the community pharmacy workforce in Northern Ireland (NI) regarding  
11 changes in community pharmacy practice/processes in preparation for, and response to the  
12 COVID-19 pandemic.

## 21 22 **METHOD**

23  
24  
25 A cross-sectional study was undertaken involving administration of a brief telephone  
26 questionnaire with community pharmacists in NI to examine their immediate views and  
27 experiences of changes in community pharmacy practice/processes in preparation for, and in  
28 response to, COVID-19. This study received ethical approval from the Queen's University  
29 Belfast Faculty of Medicine, Health and Life Sciences Research Ethics Committee (Ref. No.  
30 MHLS 21\_21).

### 31 32 33 **Patient and Public Involvement**

34  
35  
36 Two patient and public involvement (PPI) representatives were recruited to the Study  
37 Advisory Group via the Patient Involvement Enhancing Research (PIER) NI network from the  
38 Health and Social Care Research and Development division. The Study Advisory Group also  
39 included members of the pharmacy profession representing practice, regulation and  
40 professional advocacy, along with a methodological advisor. The Group contributed to the  
41 development of the telephone questionnaire (see below) and advised on other aspects of the  
42 study, including providing commentary on the findings.

### 43 44 45 **Questionnaire development**

46  
47  
48 The telephone questionnaire was developed based on documentary analysis of key policy  
49 publications from health policy, commissioning and professional organisations in NI, and  
50 relevant literature describing a framework of activities that pharmacy personnel can  
51  
52  
53  
54  
55  
56  
57  
58  
59  
60

1  
2  
3 undertake in preparation/response to crises such as COVID-19.<sup>[10] [11]</sup> The questionnaire  
4 included items on demographics, followed by six main sections encompassing community  
5 pharmacists' experiences of working during the pandemic and specifically during March-  
6 May 2020 (Wave 1) and September-December 2020 (Wave 2) , i.e. (1) prevention of  
7 infection spread, (2) maintaining pharmacy services, (3) preparedness for and response to  
8 the COVID-19 pandemic, (4) communicating with others (5) updating professional  
9 knowledge and (6) looking to the future. To minimise the impact of administering the  
10 questionnaire on daily practice, the content was designed to ensure that the questionnaire  
11 was concise. Respondents could skip any questions that they preferred not to answer. It was  
12 piloted with volunteer community pharmacists (n=5) to assess face and content validity and  
13 was refined on the basis of their responses. This piloting indicated that completion time for  
14 the questionnaire was approximately 15 minutes. Pilot responses were not included in the  
15 final analysis. A copy of the questionnaire is provided in Supplementary File 1.

### 26 27 28 **Sampling**

29 A purposive and geographically stratified sample of community pharmacists was recruited  
30 for the study. Using the publicly available information on contact details of registered  
31 pharmacies in NI, community pharmacies were stratified according to Local Commissioning  
32 Group (LCG) areas, of which there are five. LCGs commission health and social care services  
33 based on the needs of local populations. The numbers sampled were in proportion to the  
34 number of registered pharmacies in each locality to ensure representation across NI.

35  
36  
37  
38  
39  
40  
41 In November 2020, there were 528 community pharmacies in NI. In order to attain a  
42 statistically representative sample of pharmacists across NI, and to estimate the percentage  
43 response to any questions in the questionnaire with a 95% confidence level to within +/-  
44 7.5% (i.e. a 95% confidence level to within  $\pm 7.5\%$  of any questionnaire responses), a sample  
45 of n=130 respondents to the questionnaire was required. Based on the total number of  
46 pharmacies across NI (n=528) and an anticipated response rate of 30%, up to a maximum  
47 number of 433 pharmacies were contacted (from the 528) to achieve the required sample  
48 size (n=130). This equated to a sampling fraction of 24% of the total number of pharmacies.  
49 Within each LCG area, a random list of pharmacies was generated. Pharmacies were  
50 telephoned sequentially in each LCG area by the researcher (SP) using the random list until  
51 the required number within each LCG area was achieved.  
52  
53  
54  
55  
56  
57  
58  
59  
60

## Recruitment and consent

To raise awareness in advance of recruitment, summary information about the study was made available to all community pharmacies through a number of pharmacy organisations e.g. Pharmacy Forum, Community Pharmacy NI, with close links with the community pharmacy sector.

Pharmacies were contacted by telephone in random order across the LCGs by the researcher (SP). SP briefly outlined the study and referred to the summary information circulated to pharmacies in advance to determine if a pharmacist would be interested in taking part. SP advised that the questionnaire would take approximately 15 minutes to complete. Community pharmacists were offered the opportunity to complete the questionnaire during the telephone call or to arrange a later time and date that was more convenient. Further information about the study, if requested, was provided via email. Community pharmacists interested in taking part were asked to provide verbal consent over the telephone; this was documented and audio-recorded. The explicit yes/no responses for consent were documented on the telephone questionnaire form. The records of consent were stored separately from the completed questionnaire responses.

## Data collection

A unique study ID number was assigned to each community pharmacist participant and recorded on a hard copy of the questionnaire. The study IDs were stored in a password-protected Microsoft Excel spreadsheet which acted as a log, linking ID numbers to respondents known only to the researcher and stored on the researcher's secure and password-protected laptop. Verbal responses to the questions were recorded by the researcher (SP) on the form. If the community pharmacist was interrupted during the questionnaire data collection, they were asked if they were willing to complete the questionnaire at a later time and an appointment was arranged. All participants completed the questionnaire only once.

## Data analysis

Data were analysed descriptively using SPSS v27,<sup>[12]</sup> reporting frequencies, percentages and 95% confidence intervals. Free text responses to questions were recorded, and grouped into broad themes.

## RESULTS

During March–May 2021, the researcher initially invited 175 community pharmacists. Just under 80% (79.4%; n=139) of community pharmacists agreed to participate and 74.3% (n=130) completed the questionnaire by telephone with the researcher (representing 130 pharmacies). Nine community pharmacists were unable to complete the survey due to interruptions during administration and could not be contacted again. Completion of the telephone questionnaires took 46 working days, with 62.9% (n=110) community pharmacists deferring the call to another day due to work pressures at the time of the arranged call.

The demographic characteristics of the 130 participating community pharmacists are reported in Table 1 and the characteristics of the pharmacies in which they worked are reported in Table 2. There was a higher percentage (55.4%; n=72) of pharmacist respondents who were female, most participants were aged between 25–54 years old, and 36.2% (n=47) been in practice for more than 11 years. The majority of respondents were employees (80.8%; n=105) and just over 50% (51.5%; n=67) were dispensary managers. The pharmacies in which the respondents worked were located in largely urban (43.1%; n=56) or suburban settings (37.7%; n=38); just over 30% (32.3%; n=42) were independently owned and 38.5% (n=50) were part of a large chain (group of more than 20 pharmacies).

**Table 1. Demographic characteristics of community pharmacists who completed the telephone questionnaire**

| Characteristic | n (%)     |
|----------------|-----------|
| <u>Gender</u>  |           |
| Female         | 72 (55.4) |
| Male           | 58 (44.6) |
| <u>Age</u>     |           |
| < 25 years     | 6 (4.6)   |
| 25–34 years    | 53 (40.8) |
| 35–44 years    | 38 (29.2) |

|                                                       |            |
|-------------------------------------------------------|------------|
| 45-54 years                                           | 21 (16.2)  |
| ≥ 55 years                                            | 12 (9.2)   |
| <u>Number of years in community pharmacy practice</u> |            |
| ≤ 5 years                                             | 36 (27.7)  |
| 6-10 years                                            | 22 (16.9)  |
| 11-15 years                                           | 25 (19.2)  |
| ≥ 15 years                                            | 47 (36.2)  |
|                                                       | -          |
| <u>Status</u>                                         |            |
| Owner/contractor                                      | 25 (19.2)  |
| Employee                                              | 105 (80.8) |
| <u>Usual Role</u>                                     |            |
| Owner manager                                         | 17 (13.1)  |
| Responsible pharmacist                                | 12 (9.2)   |
| Dispensary manager                                    | 67 (51.5)  |
| Locum pharmacist                                      | 13 (10.0)  |
| Pharmacist team member                                | 15 (11.5)  |
| Superintendent                                        | 6 (4.6)    |
| Shielding during Wave 1*                              | 8 (6.2)    |

\*Measures taken by those at highest risk of severe illness from COVID-19 (e.g. self-isolation)

**Table 2. Characteristics of participating community pharmacies**

| <b>Geographical Location (LCG Area)</b> | <b>n (%)</b> |
|-----------------------------------------|--------------|
| Belfast                                 | 32 (24.6)    |
| Northern                                | 28 (21.5)    |
| South-Eastern                           | 24 (18.5)    |
| Southern                                | 22 (16.9)    |
| Western                                 | 24 (18.5)    |
| <b>Location Type</b>                    |              |
| Urban                                   | 56 (43.1)    |
| Rural                                   | 36 (27.7)    |
| Suburban                                | 38 (29.2)    |
| <b>Pharmacy Type</b>                    |              |
| Independent                             | 42 (32.3)    |
| Small chain <5                          | 18 (13.8)    |
| Medium chain 5-20                       | 20 (15.4)    |
| Large chain >20                         | 50 (38.5)    |



## Preventing the spread of COVID-19

During the first wave, the most common measure was the management of social distancing in the pharmacy (96.2%; n=125), including one-way systems, limiting capacity within the pharmacy, and queue management (Table 3). Adjustments such as the erection of barriers or screens, were made to premises in 95.4% (n=124) of pharmacies to reduce the risk of contact between staff and patients. Cleaning and disinfection of premises became a routine task during the pandemic first wave, implemented in 93.8% (n=122) of pharmacies and performed at least twice a day in most. Public health information was displayed in 92.3% (n=120) pharmacies, using materials from the public health campaigns that focused on COVID-19-related issues.

**Table 3 Measures taken during the onset of the pandemic (March-May 2020) to prevent the spread of COVID-19 in community pharmacies**

| Prevention of Infection Measures                           | Implemented in March-May 2020 |           | Stopped in June-August 2020 |            | Started at a later date (after September 2020) n (%) |
|------------------------------------------------------------|-------------------------------|-----------|-----------------------------|------------|------------------------------------------------------|
|                                                            | Yes n (%)                     | No n (%)  | Yes n (%)                   | No n (%)   |                                                      |
| Management of social distancing                            | 125 (96.2)                    | 5 (3.8)   | ~                           | 122 (93.8) | ~                                                    |
| Premises adjustments such as barriers, screens             | 124 (95.4)                    | 6 (4.6)   | 115 (88.5)                  | 9 (6.9)    | 5 (3.8)                                              |
| Protocols for disinfection of pharmacy surfaces            | 122 (93.8)                    | 8 (6.2)   | 5 (3.8)                     | 122 (93.8) | 0 (0.0)                                              |
| Public health information on preventing Covid-19 displayed | 120 (92.3)                    | 10 (7.7)  | ~                           | 119 (91.5) | ~                                                    |
| Reduced face-to-face contact                               | 120 (92.3)                    | 10 (7.7)  | 6 (4.6)                     | 116 (89.2) | 0 (0.0)                                              |
| Lunchtime closing                                          | 119 (91.5)                    | 11 (8.5)  | 63 (48.5)                   | 55 (42.3)  | ~                                                    |
| Use of PPE by pharmacy staff                               | 115 (88.5)                    | 15 (11.5) | ~                           | 116 (89.2) | 11 (8.5)                                             |

|                                           |              |              |              |              |            |
|-------------------------------------------|--------------|--------------|--------------|--------------|------------|
| Changes to the use of the available space | 98<br>(75.4) | 32<br>(24.6) | 7<br>(5.4)   | 92<br>(70.8) | ~          |
| Shorter opening hours                     | 87<br>(66.9) | 43<br>(33.1) | 69<br>(53.1) | 17<br>(13.1) | 0<br>(0.0) |
| Changes to staff working patterns         | 64<br>(49.2) | 66<br>(50.8) | 9<br>(6.9)   | 57<br>(43.8) | ~          |

~ not reported as less than 5, and potentially identifiable; PPE: personal protective equipment

During the first wave, 88.5% (n=115), community pharmacists reported that staff were using personal protective equipment (PPE). When asked for further comments, pharmacists reported how government advice on PPE had changed and there was conflicting advice from other sources. Community pharmacists were concerned about protecting their staff, especially those with vulnerable family members and some introduced early protection measures, e.g. making visors when PPE was in short supply, ensuring adequate ventilation, setting up dispensary workstations two metres apart and asking delivery drivers to wear protective clothing.

Many pharmacies (75.4%; n=98) closed the shop floor space entirely or reduced it and reused the space to prepare and check prescriptions, monitored dosage system boxes and orders for delivery. Working patterns and break times were changed in 49.2% (n=64) pharmacies to reduce the number of staff working at any one time. Many staff worked longer hours and started early to manage the increased volume of prescriptions. Many of the changes outlined in Table 4 were maintained over the time periods assessed, except lunchtime closing, which was stopped in almost 50% of pharmacies (48.5% n=63) in June-August 2020.

### **Maintaining pharmacy services during the pandemic**

Core pharmacy services, principally dispensing, continued to be provided from all pharmacies throughout March–December 2020, while over-the-counter (OTC) medicines advice and supply were available from 128 (98.5%) and 121 (93.1%) pharmacies respectively (Table 4). Prescription collection and delivery services were maintained (and increased) by the majority of pharmacies (95.4%; n=124 and 88.5%; n=115 respectively). Of the 84 (64.6%) pharmacies that provided out-of-hours dispensing services, two stopped service provision during March-May 2020 and one restarted with a modified service during September-December 2020. Some pharmacies did not restart services until September-December 2020

and then provided them in a modified format, e.g. nursing home advice was provided by telephone or videocall by 12 (9.2%) pharmacies during Wave 2. All participating pharmacies, except one, normally provided Living Well campaigns (provision of key public health messages and advice through community pharmacies); 55 (42.3%) stopped this service at the onset of the pandemic, but by June-August 2020, 44 (33.8%) had restarted modified campaigns providing COVID-19 information to the public.

Just over 70% (71.5%; n=93) of community pharmacies stopped smoking cessation services, 56.2% (n=73) restarted the service during June-August 2020 and 16.1% (n=21) reported providing a modified service by September-December 2020. Pharmacists reported that opioid substitution treatment supervision (OST) was initially stopped, but then as patients' needs were reassessed, it was recommenced in a modified format, e.g increased supervision by addiction team staff. Most private travel vaccination services did not restart as there was little demand for them.

During the pandemic, a number of new services were commissioned and provided by community pharmacies. In addition, many new initiatives were undertaken as the pandemic progressed such as "drive-through" pharmacies or the equivalent such as 'call and collect' and measures to flag/assist patients with sensitive issues such as domestic violence reporting. The new services/initiatives and their status over time are presented in Table 4 below:

**Table 4. Newly commissioned services and community pharmacy initiatives during the COVID-19 pandemic.**

| New Services or Initiatives                                        | Implemented in March-May 2020<br>n (%) |              | Stopped in June-August 2020<br>n (%) |               | Started at a later date<br>n (%) |
|--------------------------------------------------------------------|----------------------------------------|--------------|--------------------------------------|---------------|----------------------------------|
|                                                                    | Yes                                    | No           | Yes                                  | No            |                                  |
| Emergency Supply during a pandemic service (ESS)                   | 121<br>(93.1)                          | 9<br>(6.9)   | ~                                    | 117<br>(90.0) | 0 (0.0)                          |
| Flu vaccination service (frontline Health and Social Care workers) | 101<br>(77.7)                          | 29<br>(22.3) | 101<br>(77.7)                        | 0<br>(0.0)    | 0<br>(0.0)                       |

|                                                                                                                          |              |               |              |              |              |
|--------------------------------------------------------------------------------------------------------------------------|--------------|---------------|--------------|--------------|--------------|
| Situation reporting (staffing/stock) to the Health and Social Care Board                                                 | 74<br>(56.9) | 56<br>(43.1)  | 10<br>(7.7)  | 64<br>(49.2) | 0<br>(0.0)   |
| Measures to flag/assist patients with sensitive issues such as domestic violence reporting                               | 73<br>(56.2) | 57<br>(43.8)  | 0<br>(0.0)   | 73<br>(56.2) | 6<br>(4.6)   |
| Prescription delivery by volunteers in the local community                                                               | 71<br>(54.6) | 59<br>(45.4)  | 32<br>(24.6) | 39<br>(30.0) | 0<br>(0.0)   |
| Referrals to Test and Trace services                                                                                     | 70<br>(53.8) | 60<br>(46.2)  | ~            | 68<br>(52.3) | 0<br>(0.0)   |
| Employment of additional staff, e.g. dentists, volunteers, students, retired pharmacists                                 | 49<br>(37.7) | 81<br>(62.3)  | 22<br>(16.9) | 27<br>(20.8) | 0<br>(0.0)   |
| Drive-through (or equivalent) pharmacy services                                                                          | 33<br>(25.4) | 97<br>(74.6)  | ~            | 32<br>(24.6) | 0<br>(0.0)   |
| Replenishment of care home pandemic packs                                                                                | 19<br>(14.6) | 107<br>(82.4) | ~            | 15<br>(11.5) | ~            |
| Palliative care on-call services                                                                                         | 19<br>(14.6) | 111<br>(85.4) | ~            | 17<br>(13.1) | 0<br>(0.0)   |
| Supply of medicines usually supplied in the hospital setting (e.g. oncology, antiretroviral drugs, 'Healthcare at Home') | 11<br>(8.5)  | 119<br>(91.5) | 0<br>(0.0)   | 11<br>(8.5)  | 0<br>(0.0)   |
| Medicines delivery service (to vulnerable people) (commissioned September 2020)                                          | n/a          | n/a           | n/a          | n/a          | 95<br>(73.1) |

~ not reported as less than 5, and potentially identifiable

The Emergency Supply Service (allowing a month's supply of medicines to be provided in the absence of a prescription) was widely implemented from the onset of the pandemic. It was initially provided by 93.1% (n=121) of community pharmacies, four of whom stopped provision in June-August 2020. Pharmacists commented that this was due to an inappropriately excessive demand for pain medication in urban areas. The 'flu vaccination campaign was provided by 77.7% (n=101) of community pharmacies. Only 56.9% (n=74)

1  
2  
3 reported participation in the Situation Reporting scheme (updating health officials on  
4 staffing and stock issues) and 56.2% (n=73) implemented measures to flag domestic  
5 violence (“Ask for ANI” initiative). Almost 55% (54.6%; n=71) used volunteer delivery  
6 services but by June-August 2020, 24.6% (n=32) had stopped and by September-December  
7 2020, 73.1% (n=95) of pharmacies had switched to commissioned Home Delivery services.  
8 From free text comments, pharmacists commented that the volunteer services were  
9 invaluable but that in some cases, they had encountered problems with insurance and  
10 confidentiality issues.  
11  
12  
13  
14  
15  
16  
17

### 18 **Preparedness for and response to the COVID-19 pandemic**

19  
20  
21 Pharmacists were asked to recall the initial outbreak of the pandemic (March-May 2020)  
22 and to reflect on their level of preparedness. The responses are shown in Table 5 and  
23 illustrate the changes in preparedness over time. Initially, 74.6% (n=97) of pharmacies  
24 reported having had appropriate working patterns in place and 66.2% (n=86) had sufficient  
25 PPE available for staff at the onset of the pandemic, but after six months, this increased to  
26 95.4% (n=124) and 99.2% (n=129) respectively. Increases were also seen over the time  
27 period in the number of pharmacies reporting that business continuity plans were in place  
28 in their premises for prolonged staff absences or for the eventuality of pharmacy closure.  
29 Employee pharmacists in pharmacy multiples reported that they did not know or were  
30 unsure about the existence of business continuity plans or financial resources available  
31 during the pandemic, e.g. 54 (41.5%) were unaware of financial resources during March-  
32 May 2020. Pharmacies having sufficient information about PPE increased from 53.1%  
33 (n=69) during March-May 2020 to 99.2% (n=129) in September-December 2020, reflecting  
34 the increasing amount of advice relevant to community pharmacy available from Public  
35 Health England and the Department of Health in NI. Sufficient stocks and supplies of  
36 medicines and hand sanitisers increased over the same time periods from 65.4% (n=85) to  
37 94.6% (n=123) and 35.4% (n=46) to 99.2% (n=129) respectively.  
38  
39  
40  
41  
42  
43  
44  
45  
46  
47  
48  
49  
50  
51  
52

53 **Table 5. Community pharmacists’ reflections on how prepared they felt they were for**  
54 **working during a pandemic**  
55

| Did you have.... | During March-May 2020 | During September-December<br>2020 |
|------------------|-----------------------|-----------------------------------|
|                  |                       |                                   |

|                                                                                                   | <b>Yes<br/>n (%)</b> | <b>No<br/>n (%)</b> | <b>Don't<br/>know/Unsure<br/>n (%)</b> | <b>Yes<br/>n (%)</b> | <b>No<br/>n (%)</b> | <b>Don't<br/>know/Unsure<br/>n (%)</b> |
|---------------------------------------------------------------------------------------------------|----------------------|---------------------|----------------------------------------|----------------------|---------------------|----------------------------------------|
| Appropriate staff working patterns in place                                                       | 97<br>(74.6)         | 33<br>(25.4)        | 0<br>(0.0)                             | 124<br>(95.4)        | 6<br>(4.6)          | 0<br>(0.0)                             |
| Enough supply of PPE for staff                                                                    | 86<br>(66.2)         | 44<br>(33.8)        | 0<br>(0.0)                             | 129<br>(99.2)        | ~                   | 0 (0.0)                                |
| A business continuity plan in place for use in the event of staff absence over a prolonged period | 85<br>(65.4)         | 26<br>(20)          | 19 (14.6)                              | 101<br>(77.7)        | 10<br>(7.7)         | 19<br>(14.6)                           |
| A business continuity plan in place for use in the event of pharmacy closure                      | 85<br>(65.4)         | 21<br>(16.2)        | 24 (18.5)                              | 100<br>(76.9)        | 7<br>(5.4)          | 23<br>(17.7)                           |
| Enough stock and supply of essential prescription and OTC medicines                               | 85<br>(65.4)         | 43<br>(33.1)        | ~                                      | 123<br>(94.6)        | 6 (6<br>(4.6)       | ~                                      |
| Enough information about PPE requirements for staff                                               | 69<br>(53.1)         | 60<br>(46.2)        | ~                                      | 129<br>(99.2)        | 0<br>(0.0)          | ~                                      |
| Enough financial resources to cover the additional demands on                                     | 63<br>(48.5)         | 13<br>(10.0)        | 54 (41.5)                              | 76<br>(58.5)         | ~                   | 53<br>(40.8)                           |

|                                                                                        |              |              |   |               |              |            |
|----------------------------------------------------------------------------------------|--------------|--------------|---|---------------|--------------|------------|
| your pharmacy business                                                                 |              |              |   |               |              |            |
| A system to manage quantity limits for patients for the supply of individual medicines | 56<br>(43.1) | 73<br>(56.2) | ~ | 38<br>(29.2)  | 91<br>(70.0) | ~          |
| Enough stock and supply of hand sanitisers                                             | 46<br>(35.4) | 83<br>(63.8) | ~ | 129<br>(99.2) | 1<br>(0.8)   | 0<br>(0.0) |

~ not reported as less than 5, and potentially identifiable

Pharmacists were asked (using open questions) about what single aspect of their work they felt most prepared for and what they felt least prepared for. Forty-three pharmacists commented that they felt most prepared for continuing core services, i.e. normal dispensary work with the help of a good staff team (n=17) who demonstrated resilience and were able to keep going. They were least prepared for the surge in the workload and the increased demand for medicines (n=73), the behaviour (e.g. aggression) exhibited by the public (n=33) and wearing PPE and dealing with the risk of COVID-19 infection (n=21).

Almost all participating pharmacists (96.9%; n=126) reported that they felt better prepared for working during the second wave of the pandemic (September-December 2020) compared to the first wave (March-May 2020).

### **Communicating with others during the pandemic**

During the pandemic, 84.6% (n=110) pharmacists said that they communicated differently with GP practices and 86.9% (n=113) reported communicating differently with patients during the pandemic compared with beforehand. The dominance of telephone communication is evident, representing 75% (Figure 1a) and 69% (Figure 1b) of the communication methods used for GPs and patients respectively.

***Figure 1a and 1b about here***

### **Updating professional knowledge during the pandemic**

1  
2  
3 Almost 90% of community pharmacists (86.9%; n=113) reported that sufficient training  
4 resources were available to them during the pandemic to maintain their professional  
5 knowledge. The reported use of COVID-19 resources is illustrated in Figure 2 below:  
6  
7

8  
9 ***Figure 2 about here***  
10

11  
12  
13 Other information sources used by pharmacists were online professional courses (n=20),  
14 COVID-19 vaccine training courses (n=6) and miscellaneous resources, e.g. pharmacy  
15 publications. Pharmacists commented that they were overwhelmed by the volume of  
16 information (n=19), but sometimes they needed more, for example, clinical information  
17 (n=18), and that information changed frequently which was confusing (n=16).  
18  
19

20  
21  
22  
23 **Looking to the future**  
24

25 Using a five-point Likert-scale, pharmacists were asked for their views on three post-  
26 pandemic activities, ranging from “strongly agree” to “strongly disagree”. The activities  
27 related to re-establishing normal patient care services, COVID vaccinations and COVID  
28 testing. The responses are summarised in Figure 3.  
29  
30

31  
32  
33 ***Figure 3 about here***  
34

35 Almost 90% (87.7%; n=114) pharmacists agreed or strongly agreed that they would be able  
36 to establish normal patient care services post-pandemic. Eighty per cent (80.7%; n=105)  
37 agreed or strongly agreed that they would be willing to provide and administer COVID-19  
38 vaccinations when they were available through community pharmacies in NI. Sixty per cent  
39 (60.8%; n=79) agreed or strongly agreed that they would be willing to provide COVID-19  
40 testing within the pharmacy if available in the future.  
41  
42  
43  
44  
45  
46  
47

48  
49 **DISCUSSION**  
50

51 This study has provided an overview of experience and activities of NI community  
52 pharmacists over the early waves of the pandemic. Pharmacists responded  
53 comprehensively to implementing infection control measures, while maintaining medicines  
54 supply and advice to patients and providing newly commissioned services. They were least  
55 prepared for the increased workload and patients’ challenging behaviour, but the majority  
56 reported that they felt better prepared during the second wave of the pandemic.  
57  
58  
59  
60



1  
2  
3 Pharmacists agreed/strongly agreed that they would be able to re-establish normal services,  
4 were willing to administer COVID-19 vaccines and provide COVID-19 testing in the future.  
5  
6  
7

8  
9 In the early stages of the pandemic, pharmacies introduced a range of public health  
10 measures (social distancing, barriers, one-way systems, cleaning), and tried to provide PPE  
11 for staff. Many of these measures have been noted in other community pharmacy studies  
12 which highlighted the need to change the physical environment and protect staff as far as  
13 possible.<sup>[2] [13]</sup> Working patterns also changed to allow pharmacies to manage workload and  
14 to reduce the number of staff working at any one time. By introducing such measures,  
15 pharmacists were able to maintain a range of core pharmacy services. However, it was  
16 deemed necessary to discontinue some services temporarily to allow critical tasks such as  
17 dispensing to continue. There was also an increase in collection and delivery services,  
18 particularly for vulnerable patients who were not in a position to come to a pharmacy  
19 personally. In circumstances such as these, priority will be given to what is deemed  
20 essential.<sup>[14]</sup>  
21  
22  
23  
24  
25  
26  
27  
28  
29  
30  
31

32  
33 The onset of the pandemic also provided an opportunity to innovate and introduce new  
34 services. Of particular note was the widespread introduction of a new emergency supply  
35 system for medicines and a 'flu vaccination service specifically for frontline health workers  
36 ](thus paving the way for COVID vaccinations later). Many of these services reinforced the  
37 public health role of pharmacists and reflected the accessibility of the profession at a time  
38 when many other services were not available to patients.<sup>[4] [15]</sup>  
39  
40  
41  
42  
43  
44

45  
46 As might be expected, there was an increase in the reported perceived level of  
47 preparedness by pharmacists on most aspects of practice from March-May 2020 compared  
48 to September-December 2020. Notable increases were observed in having sufficient PPE  
49 (and relevant information) and hand sanitiser stock, and supplies of medicines. As  
50 pharmacists gained experience of working under pandemic conditions, there would have  
51 been growing awareness of where to access supplies such as PPE, and how to manage  
52 workload.<sup>[2]</sup> Although they felt most prepared for maintaining core services such as  
53 dispensing, the increase in requirements for medicines and resultant increase in workload  
54 was somewhat unexpected.<sup>15</sup> These issues have been previously reported.<sup>[4] [15]</sup> A time-  
55  
56  
57  
58  
59  
60

1  
2  
3 trend analysis of data from community pharmacies in Portugal revealed an increase in the  
4 demand for medicines, and accompanying shortages in the early stages of the pandemic.<sup>[16]</sup>  
5  
6  
7  
8  
9  
10  
11  
12  
13  
14  
15  
16  
17  
18  
19  
20  
21  
22  
23  
24  
25  
26  
27  
28  
29  
30  
31  
32  
33  
34  
35  
36  
37  
38  
39  
40  
41  
42  
43  
44  
45  
46  
47  
48  
49  
50  
51  
52  
53  
54  
55  
56  
57  
58  
59  
60

Bharma et al.<sup>[4]</sup> who undertook a cross-sectional study of a range of community pharmacy staff noted that 94% of participants reported an increase in workload, partly driven by a higher volume of medication dispensing activities.

Methods of communication needed to change with GPs and patients due to practices being closed, or patients isolating or being unable to come to the pharmacy in person. Telephone contact was the most common mode of communication. Although the use of online platforms for remote consultations has increased within general practice,<sup>[17]</sup> based on the findings of this survey, this does not seem to have been replicated to the same extent in community pharmacy, and which has also been noted elsewhere.<sup>[18]</sup> Carpenter et al. noted that digital connectivity issues can impact on the ability to provide online consultations.<sup>[18]</sup>

Community pharmacists continued to maintain their professional knowledge over the course of the pandemic, largely in relation to COVID-19, using resources from the Department of Health, or professional organisations. Some pharmacists reported that the volume of information was overwhelming, contradictory or unclear e.g. advice in relation to PPE, which has been noted in other countries (e.g. Netherlands, USA).<sup>[2]</sup><sup>[18]</sup> The evidence base relating to COVID-19 changed rapidly, and other health professionals have reported how difficult it was to keep up-to-date.<sup>[19]</sup> An important lesson for future pandemic planning is the need to rationalise the amount of information being released to health care professionals and to ensure consistency across different sources.

As pharmacists looked to a post-pandemic future, they were confident that they could re-establish normal services, but also participate in ongoing public health efforts such as COVID-19 vaccination and testing. Indeed, the latter two activities have become part of practice, with community pharmacy making a significant contribution to the vaccination programme,<sup>[20]</sup> and playing a critical role in the supply of lateral flow tests.<sup>[21]</sup><sup>[22]</sup>

The study has a number of strengths. We attained our target sample, and the mode of administration (which was novel in this context) ensured that there was very little missing

1  
2  
3 data. The sample was stratified ensuring broad geographical representation from across NI.  
4  
5 However, the focus on NI is one of the limitations as the findings may not be generalisable  
6  
7 to other regions within or beyond the UK. Telephone administration also meant that we  
8  
9 were limited in the number of pharmacists who could be contacted due to time and  
10  
11 resource constraints. Other modes of administration of the questionnaire had been  
12  
13 considered, e.g. postal or online, but in view of the busyness of community pharmacies  
14  
15 during the pandemic, we concluded that direct contact by telephone might yield a better  
16  
17 response rate. Experience with postal questionnaires to community pharmacists has  
18  
19 indicated that response rates rarely exceed 30%,<sup>[23]</sup> and online response rates are also  
20  
21 extremely variable, therefore we feel that our choice of telephone administration is  
22  
23 justified. The timing of administration was fortuitous as pharmacists appeared to have had  
24  
25 sufficient time to reflect on how practice had changed over that time period. Attempting to  
26  
27 administer the questionnaire at an earlier time point may have been difficult as pharmacists  
28  
29 were still adjusting to new ways of working and coping with increased workload demands,  
30  
31 which has been reported in other pharmacy studies.<sup>[24]</sup>

32  
33 The results from this study have provided a snapshot of how pharmacy practice changed  
34  
35 over the early phases of the COVID-19 pandemic, with essential services being maintained,  
36  
37 other services suspended, and new services being introduced. The survey aligned with the  
38  
39 'process' aspect of Donabedian's model of quality of care, focusing on how practice  
40  
41 (processes) had changed.<sup>[8]</sup> Despite feeling unprepared during the first wave, this improved  
42  
43 with time, which although not unexpected, appears not to have been reported before. It  
44  
45 has been generally recognised that community pharmacy made an immense contribution to  
46  
47 health care during the pandemic when many other services were not available to patients.  
48  
49 <sup>[4]</sup> <sup>[25]</sup> This has been recognised by other key stakeholders (e.g. other health professions,  
50  
51 professional and governing organisations), and is reported in an accompanying paper.<sup>9</sup>  
52  
53 These findings need to inform ongoing and future planning for community pharmacy  
54  
55 services, and especially in the context of another pandemic.<sup>[26]</sup> Public health measures  
56  
57 need to be instigated quickly, along with prioritisation of essential services. It may be  
58  
59 necessary to have access to additional staff to deal with the observed increase in workload,  
60  
or redeploy from sectors that are not under immediate pressure (this was done to some  
extent using dentists). Careful attention needs to be given to the volume and consistency of

1  
2  
3 key information to avoid confusion, with greater coordination.<sup>[4] [27]</sup> Important lessons have  
4 been learned as to the pressures that community pharmacists have faced, and these must  
5 be integral to future planning and implementation of services in preparation for the next  
6  
7 crisis.<sup>[4] [16] [25]</sup>  
8  
9

10  
11  
12 **Acknowledgements:** The authors wish to acknowledge the contribution of the community  
13 pharmacists who participated in the study. We also wish to thank the members of the Study  
14 Advisory Group for their advice and support and those pharmacists who helped to pilot the  
15 questionnaire.  
16  
17  
18

19  
20  
21 **Contributors:** Conception/design: CAC, HEB, KB, CMH; Acquisition, analysis or interpretation  
22 of the data: SMP, CAC, HEB, KB, CMH; Manuscript drafting, revision, approval: SMP, CAC,  
23 HEB, KB, CMH. Overall guarantors: CMH. The guarantor accepts full responsibility for the  
24 work and/or the conduct of the study, had access to the data and controlled the decision to  
25 publish.  
26  
27  
28

29  
30  
31 **Funding:** This work was funded by the Health and Social Care Research and Development  
32 Division of the Public Health Agency, NI, under its COVID-19 Rapid Response Funding Call  
33 (Ref. No. COM/5601/20). The content or views expressed are those of the  
34 authors/presenters and do not necessarily reflect the official views of the HSC R&D Division.  
35  
36  
37  
38

39  
40  
41 **Competing interests:** None to declare  
42

43  
44  
45 **Patient consent for publication:** Not required  
46

47  
48  
49 **Data availability statement:** Data are available upon reasonable request  
50

51  
52  
53 **Ethics statement:** This study received ethical approval from the Queen's University Belfast  
54 Faculty of Medicine, Health and Life Sciences Research Ethics Committee (Ref. No. MHLS  
55 21\_21).  
56  
57  
58  
59  
60

## REFERENCES

1. Cadogan CA, Hughes CM. On the frontline against COVID-19: Community pharmacists' contribution during a public health crisis. *Res Social Adm Pharm* 2021;17:2032-2035
2. Koster ES, Philbert D, Bouvy ML. Impact of the COVID-19 epidemic on the provision of pharmaceutical care in community pharmacies. *Res Social Adm Pharm* 2021;17:2002-2004
3. Costa S, Romao M, Mendes M, et al. Pharmacy interventions on COVID-19 in Europe: Mapping current practices and a scoping review. *Res Social Adm Pharm* [doi.org/10.1016/j.sapharm.2021.12.003](https://doi.org/10.1016/j.sapharm.2021.12.003)
4. Bhamra SK, Parmar J, Heinrich M. Impact of the coronavirus pandemic (COVID-19) on the professional practice and personal well-being of community pharmacy teams in the UK. *Int J Pharm Pract* 2021;29:556-565
5. Barry HE, Cadogan CA, O'Reilly E, et al. Changes to community pharmacy practice during the COVID-19 pandemic: a cross-country documentary analysis. *Int J Pharm Pract* 2022;30(S1):i21-i22
6. Bahlol M, Dewey RS. Pandemic preparedness of community pharmacies for COVID-19 *Res Social Adm Pharm* 2021;17:1888-1896
7. International Pharmaceutical Federation (FIP Health Advisory). Coronavirus 2019-nCoV Outbreak. Information and interim guidelines for pharmacists and the pharmacy workforce 2020 The Netherlands. Available from: <https://www.fip.org/files/content/priorityareas/coronavirus/Coronavirus-guidance-update-ENGLISH.pdf>, [Accessed: February 21 2022]
8. Donabedian A. The quality of care. How can it be assessed? *JAMA* 1988;260:1743-8.
9. Patterson SM, Cadogan CA, Barry HE, et al. "It stayed there, front and centre": Perspectives on community pharmacy's contribution to front-line health care services during the COVID-19 pandemic. *BMJ Open*, submitted
10. Alkhalili M, Ma J, Grenier S. Defining roles for pharmacy personnel in disaster response and emergency preparedness. *Disaster Med Public Health Prep* 2017;11:496-504
11. Zaidi STR, Hasan SS. Personal protective practices and pharmacy services delivery by community pharmacists during COVID-19 pandemic: results from a national study. *Res Social Adm Pharm* 2021;17:1832-1837
12. SPSS Inc. Released 2008. SPSS Statistics for Windows, Version 17.0. Chicago: SPSS Inc
13. World Health Organisation. Maintaining Essential Health Services: Operational guidance for the COVID-19 context. Interim Guidance 1 June 2020. World Health Organisation, 2020. Available from: [https://www.who.int/publications/i/item/WHO-2019-nCoV-essential\\_health\\_services-2020.2](https://www.who.int/publications/i/item/WHO-2019-nCoV-essential_health_services-2020.2) [Accessed February 21 2022]
14. Visacri MB, Figueiredo IV, Lima TM. Role of pharmacist during the COVID-19 pandemic: A scoping review. *Res Social Adm Pharm* 2021;17:1799-1806
15. Wickware C. Pharmacies' dispensing increases by up to a third as a result of COVID-19, survey finds. *Pharm J* 2020;306:doi:10.1211/PJ.2020.20207917.

16. Romano S, Galante H, Figueira D, et al. Time-trend analysis of medicines sales and shortages during COVID-19 outbreak: data from community pharmacies. *Res Social Adm Pharm* 2021;17:1876-1881
17. Murphy M, Scott LJ, Salisbury C, et al. Implementation of remote consulting in UK primary care following the COVID-19 pandemic: a mixed-methods longitudinal study. *Br J Gen Pract* 2021;71:e166-e177
18. Carpenter DM, Hastings T, Westrick S, et al. Rural community pharmacies' preparedness for and responses to COVID-19. *Res Social Adm Pharm* 2021;17:1327-1331
19. Rosenquist JN. The stress of Bayesian medicine-uncomfortable uncertainty in the face of COVID-19. *New Engl J Med* 2021;384:7-9
20. Wickware C. Pharmacy leaders in 'urgent talks' with NHS as COVID-19 booster vaccination campaign is ramped up. *Pharm J* 2021;307:doi:10.1211/PJ.2021.1.12-231
21. Wickware C. Record numbers of lateral flow tests sent to pharmacies amid supply issues. *Pharm J* 2021;307:doi:10.1211/PJ.2021.1.121205
22. Wickware C. Community pharmacies fulfil 17 million lateral flow test requests, official data show. *Pharm J* 2022;308:doi:10.1211/PJ.2022.1.129133
23. Patton DE, Ryan C, Hughes CM. Enhancing community pharmacists' provision of medication adherence support to older adults: a mixed methods study using the Theoretical Domains Framework. *Res Social Adm Pharm* 2021;17:406-418
24. Austin Z, Gregory P. Resilience in the time of pandemic: the experience of community pharmacists during COVID-19. *Res Social Adm Pharm* 2021;17:1867-1875
25. Parkhurst C, Purewal GS, Donyai P. Community pharmacy and COVID-19-the unsung heroes on our high streets. *J Patient Exp* 2020;7:282-284
26. Maidment I, Young E, MacPhee M, et al. Rapid realist review of the role of community pharmacy in the public health response to COVID-19. *BMJ Open* 2021;11:e050043. doi:10.1136/bmjopen-2021-050043
27. Lloyd-Smith MK. The COVID-19 pandemic: resilient organisational response to a low-chance, high-impact event. *BMJ Leader* 2020;4:109-112

1  
2  
3 **Figure legends**  
4  
5

6  
7 **Figure 1a Pharmacists' methods of**  
8 **communication with GP practices**  
9 **during the pandemic**  
10  
11

7 **Figure 1b Pharmacists' methods of**  
8 **communication with patients during the**  
9 **the pandemic**  
10  
11

12  
13  
14 **Figure 2 COVID-19 Information sources used by community pharmacists (n=130)**  
15

16 HSCNI and DoH: Advisory letters/emails were provided regularly by the Health and Social Care Board, the Department of  
17 Health and related agencies

18 Summarised information: Distilled information provided by the contractor/head office or a professional organisation e.g.  
19 Community Pharmacy NI, Pharmacy Forum

20 FAQs: Frequently Asked Questions updated daily on the Business Services Organisation (BSO) website

21 ECHO sessions: Online video sessions provided by Department of Health and Health & Social Care Board  
22

23 **Figure 3 Views of pharmacists (n=130) on selected post-pandemic activities**  
24  
25  
26  
27  
28  
29  
30  
31  
32  
33  
34  
35  
36  
37  
38  
39  
40  
41  
42  
43  
44  
45  
46  
47  
48  
49  
50  
51  
52  
53  
54  
55  
56  
57  
58  
59  
60

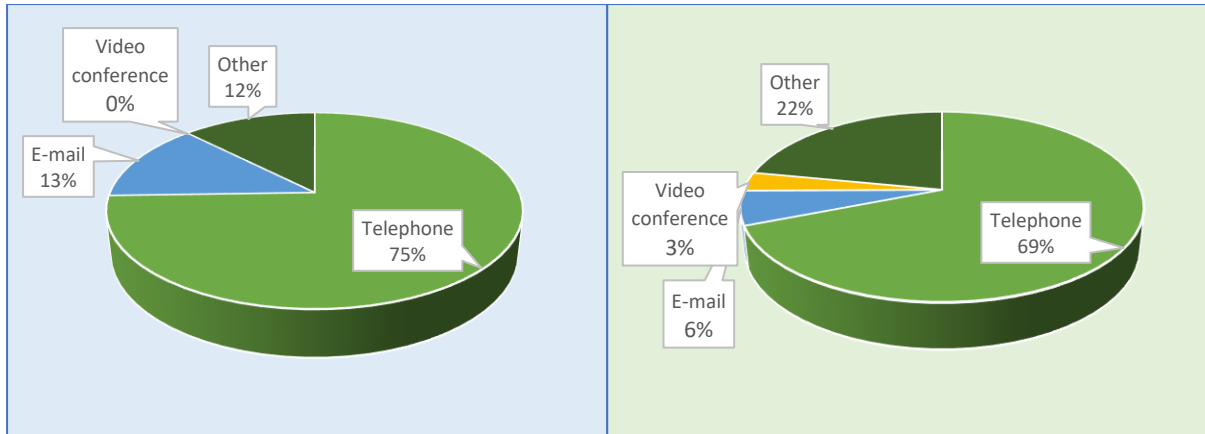

**Figure 1a Pharmacists' methods of communication with GP practices during the pandemic**

**Figure 1b Pharmacists' methods of communication with patients during the pandemic**





**Figure 2 COVID-19 Information sources used by community pharmacists (n=130)**

HSCNI and DoH: Advisory letters/emails were provided regularly by the Health and Social Care Board, the Department of Health and related agencies

Summarised information: Distilled information provided by the contractor/head office or a professional organisation e.g. Community Pharmacy NI, Pharmacy Forum

FAQs: Frequently Asked Questions updated daily on the Business Services Organisation (BSO) website

ECHO sessions: Online video sessions provided by Department of Health and Health & Social Care Board



**Figure 3 Views of pharmacists (n=130) on selected post-pandemic activities**

Peer review only

## ----- Section 1: Introduction and Consent -----

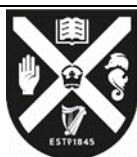**QUEEN'S  
UNIVERSITY  
BELFAST****Community Pharmacy COVID-19 Study: Telephone questionnaire**

**“A mixed methods study of the community pharmacy workforce’s preparedness for, and response to, the COVID-19 pandemic”**

**INTRODUCTION**

Hello, my name is Susan Patterson. I’m from the School of Pharmacy, Queen’s University Belfast and I’m a pharmacist undertaking a research study about community pharmacy’s preparedness for and response to the COVID-19 pandemic in Northern Ireland. I’m phoning to see if you might be interested in taking part in a short telephone questionnaire. The Pharmacy Forum and NPA recently circulated information about the study to all community pharmacists. Your experience of working in community pharmacy during the pandemic will be vitally important to help shape how community pharmacies prepare for any future pandemics or public health crises. Does this sound like something you would be interested in?

Yes No 

The questionnaire takes roughly 15 minutes and can be completed with me now or alternatively I can call back later at a time that suits you<sup>1</sup>.

**CONSENT**

Completion of this questionnaire is completely voluntary, and the results will be anonymous to anyone other than the research team who will treat all the information confidentially. You have the right to skip questions and to withdraw from the study, without giving a reason, at any time. If you withdraw, you can contact me on this phone number or at the School of Pharmacy and I will delete all data relating to you.

I will now read you a series of statements about the study which I would like you to respond to with either “Yes” or “No”. I will audio-record and note your responses on the telephone questionnaire form.

1. I confirm that I have read, or had read to me, and understand the information provided in advance by email for the study. I have had the opportunity to ask questions and these have been answered fully

---

<sup>1</sup> Suitable dates/times for call backs to be recorded by the researcher in a separate spreadsheet

## Community Pharmacy COVID-19 Study ID \_\_\_\_\_

Yes No 

2. I understand that my participation is voluntary and I am free to withdraw at any time, without giving any reason.

Yes No 

3. I understand the study is being conducted by researchers from Queen's University Belfast and that my personal information will be held securely on University premises and handled in accordance with the provisions of the Data Protection Act 2018.

Yes No 

4. I understand that data collected as part of this study may be looked at by authorized individuals from Queen's University Belfast, Trinity College Dublin and Royal College of Surgeons in Ireland) where it is relevant to my taking part in this research. I give permission for these individuals to have access to this information.

Yes No 

5. I agree to take part in the above study.

Yes No 

- **If the reply is No,**  
"Thank you for speaking to me today and goodbye".
- **If the reply is Yes,** proceed with completing the questionnaire.

**"In the interests of time, I will try to keep this as short as possible. Please help me by keeping your responses brief. If we are interrupted, can I call back later to finish it?"**

Yes No 

Suitable alternative times:

---

---

---

## Community Pharmacy COVID-19 Study ID \_\_\_\_\_

## ----- Section 2: Telephone Questionnaire -----

## PHARMACIST AND PHARMACY CHARACTERISTICS (DEMOGRAPHICS)

To begin, I will ask you some questions about you and the community pharmacy in which you work.

1. Pharmacist characteristics

## 1.1 Can I confirm the gender you identify as?

Female

Male

Prefer not to disclose

Other (please specify)

Other: \_\_\_\_\_

## 1.2 Which of the following categories includes your age?

&lt;25

25 - 34

35 - 44

45 - 54

55 - 64

≥65

## 1.3 How many years have you been practising as a pharmacist?

≤5

6 - 10

11 - 15

≥15

## 1.4 Are you the pharmacy owner (contractor) or an employee pharmacist?

Owner (contractor) Employee 1.5 What is your usual role in the pharmacy? Please choose one of the following:

Owner manager

Responsible pharmacist

Dispensary manager

Locum

Other (please specify)

Other: \_\_\_\_\_

**Community Pharmacy COVID-19 Study ID \_\_\_\_\_**

**1.6 Were you shielding during the early stages of the pandemic (approximately from March to May 2020)?**

Yes

No

*[If the response is yes, researcher to discuss services in Questions 4 and 6 from the time period when the pharmacist returned to work (Question 5 refers only to June/July onwards)]*

**1.7 Are you on the temporary Pharmaceutical Register?**

Yes

No

**2. Community pharmacy characteristics**

**2.1 Researcher to record: Local Commissioning Group (LCG) (or Trust) Area:**

Belfast

Northern

South Eastern

Southern

Western






**2.2 Researcher to record: Location of the pharmacy:**

Urban

Rural

Suburban

(population >10,000)

(population <5,000)

(population of 5,000 – 10,000)




**2.3 Which of the following options best describes the community pharmacy in which you work?**

Independent

Small chain (group of <5 pharmacies)

Medium chain (group of 5-20 pharmacies)

Large chain (group of >20 pharmacies)

## Community Pharmacy COVID-19 Study ID \_\_\_\_\_

**A. PHARMACIST'S EXPERIENCE OF WORKING DURING THE PANDEMIC**

I will now ask you a series of questions about your experience of working during the pandemic. The questions are about what happened from March 2020 onwards and largely follow the sequence of events up to December 2020.

**PREVENTING THE SPREAD OF COVID-19**

This first set of questions deal with preventing the spread of COVID-19.

I would like you to think about March to May 2020 when answering these initial questions. I will read out a series of statements, and for each one, please respond with either Yes or No.

| 3. Part I<br>Did you have any of the following measures in place in your pharmacy between March and May 2020 to prevent the spread of COVID-19?                             | Part I                   | Part II                                                    |
|-----------------------------------------------------------------------------------------------------------------------------------------------------------------------------|--------------------------|------------------------------------------------------------|
|                                                                                                                                                                             | Yes (Y)/No (N)           | Measures stopped in June to August 2020?<br>Yes (Y)/No (N) |
| 3.1 Public health information on preventing COVID-19, e.g. posters, 'Living Well' campaign COVID booklet?                                                                   | <input type="checkbox"/> | <input type="checkbox"/>                                   |
| 3.2 Protocols for disinfection of pharmacy surfaces                                                                                                                         | <input type="checkbox"/> | <input type="checkbox"/>                                   |
| 3.3 Use of Personal Protective Equipment (PPE) by pharmacy staff, e.g. masks, gloves, aprons, eye protection                                                                | <input type="checkbox"/> | <input type="checkbox"/>                                   |
| 3.4 Management of social distancing, e.g. number of people in the shop, floor markings for queuing in the pharmacy                                                          | <input type="checkbox"/> | <input type="checkbox"/>                                   |
| 3.5 Shorter opening hours to facilitate cleaning, re-stocking, staff breaks                                                                                                 | <input type="checkbox"/> | <input type="checkbox"/>                                   |
| 3.6 Lunchtime closing                                                                                                                                                       | <input type="checkbox"/> | <input type="checkbox"/>                                   |
| 3.7 Changes to how your available space was used, e.g. using consultation room for staff breaks                                                                             | <input type="checkbox"/> | <input type="checkbox"/>                                   |
| 3.8 Adjustments to premises, e.g. physical barriers at counters in pharmacies, screens, partitions                                                                          | <input type="checkbox"/> | <input type="checkbox"/>                                   |
| 3.9 Reduced opportunity for face-to-face contact, e.g. temporary suspension of direct patient care services                                                                 | <input type="checkbox"/> | <input type="checkbox"/>                                   |
| 3.10 Changes to staff working patterns to facilitate social distancing                                                                                                      | <input type="checkbox"/> | <input type="checkbox"/>                                   |
| <b>Part II</b><br><b>And did you stop any of these at a later date, for example, during June to August 2020?</b><br><i>[Record Yes (Y)/No (N) in 2<sup>nd</sup> column]</i> |                          |                                                            |

**3.12 Were there any other measures put in place in your pharmacy to prevent the spread of COVID-19 that you would like to mention?**

*[document free-text response]*

---



---



---



---

**Community Pharmacy COVID-19 Study ID \_\_\_\_\_**

**PHARMACY SERVICES**

The next set of questions focuses on your experience of the immediate actions taken in relation to community pharmacy services in response to the pandemic over time up to the end of December 2020.

I will ask you about each pharmacy service in turn, and I would like to think about how you responded initially and if anything changed over time. Again, please provide Yes or No responses or state “not applicable” if you don’t usually provide the service.

| 4. <u>Part I</u><br>Did you have to <b>stop</b> providing any of the following services during March-May 2020 (first wave)? If so, did you <b>restart</b> during June-August? (after 1 <sup>st</sup> wave). | Part I                                                                     |                                        |                                                                                  | Part II                                                                   |
|-------------------------------------------------------------------------------------------------------------------------------------------------------------------------------------------------------------|----------------------------------------------------------------------------|----------------------------------------|----------------------------------------------------------------------------------|---------------------------------------------------------------------------|
|                                                                                                                                                                                                             | Service provision stopped during March-May 2020 (Wave 1)<br>Yes (Y)/No (N) | N/A<br>Service is not usually provided | If stopped, Re-started by pharmacy Jun-Aug 2020 (after Wave 1)<br>Yes (Y)/No (N) | Service provision stopped during Sept-Dec 2020 (Wave 2)<br>Yes (Y)/No (N) |
| 4.1 Dispensing acute and repeat (chronic) medicines                                                                                                                                                         |                                                                            |                                        |                                                                                  |                                                                           |
| 4.2 Supply of OTC medicines                                                                                                                                                                                 |                                                                            |                                        |                                                                                  |                                                                           |
| 4.3 Medicines advice to patients                                                                                                                                                                            |                                                                            |                                        |                                                                                  |                                                                           |
| 4.4 #Living Well campaigns                                                                                                                                                                                  |                                                                            |                                        |                                                                                  |                                                                           |
| 4.5 Nursing/residential homes’ support and advice                                                                                                                                                           |                                                                            |                                        |                                                                                  |                                                                           |
| 4.6 Dispensing of out-of-hours prescriptions                                                                                                                                                                |                                                                            |                                        |                                                                                  |                                                                           |



## Community Pharmacy COVID-19 Study ID \_\_\_\_\_

| Question 4 continued.....                                                                                                                                                                                                                                                                                                     | Part I                                                                     |                                        |                                                                                  | Part II                                                                   |
|-------------------------------------------------------------------------------------------------------------------------------------------------------------------------------------------------------------------------------------------------------------------------------------------------------------------------------|----------------------------------------------------------------------------|----------------------------------------|----------------------------------------------------------------------------------|---------------------------------------------------------------------------|
| <b>Part I</b><br>Did you have to <u>stop</u> providing any of the following services during March-May 2020 (first wave)? If so, did you <u>restart</u> during June-August? (after 1 <sup>st</sup> wave).                                                                                                                      | Service provision stopped during March-May 2020 (Wave 1)<br>Yes (Y)/No (N) | N/A<br>Service is not usually provided | If stopped, Re-started by pharmacy Jun-Aug 2020 (after Wave 1)<br>Yes (Y)/No (N) | Service provision stopped during Sept-Dec 2020 (Wave 2)<br>Yes (Y)/No (N) |
| <b>4.7</b> Prescription collection*                                                                                                                                                                                                                                                                                           |                                                                            |                                        |                                                                                  |                                                                           |
| <b>4.8</b> Prescription delivery service*                                                                                                                                                                                                                                                                                     |                                                                            |                                        |                                                                                  |                                                                           |
| <b>4.9</b> #Minor Ailments Scheme/ Pharmacy First                                                                                                                                                                                                                                                                             |                                                                            |                                        |                                                                                  |                                                                           |
| <b>4.10</b> #Medicines Use Review                                                                                                                                                                                                                                                                                             |                                                                            |                                        |                                                                                  |                                                                           |
| <b>4.11</b> #Managing Your Medicines                                                                                                                                                                                                                                                                                          |                                                                            |                                        |                                                                                  |                                                                           |
| <b>4.12</b> #Smoking Cessation                                                                                                                                                                                                                                                                                                |                                                                            |                                        |                                                                                  |                                                                           |
| <b>4.13</b> Adherence support (e.g. weekly dispensing)                                                                                                                                                                                                                                                                        |                                                                            |                                        |                                                                                  |                                                                           |
| <b>4.14</b> #Supervision of Opioid Substitution Treatment*                                                                                                                                                                                                                                                                    |                                                                            |                                        |                                                                                  |                                                                           |
| <b>4.15</b> Needle and syringe exchange service*                                                                                                                                                                                                                                                                              |                                                                            |                                        |                                                                                  |                                                                           |
| <b>4.16</b> Travel Vaccination                                                                                                                                                                                                                                                                                                |                                                                            |                                        |                                                                                  |                                                                           |
| <b>4.17</b> Any others? Please specify: _____                                                                                                                                                                                                                                                                                 |                                                                            |                                        |                                                                                  |                                                                           |
| <p>*If usually provided by your pharmacy      #Stood down by HSCB during March-May 2020</p> <p><b>Part II</b> [On completion of Part 1 above, list services again and add responses to table above]</p> <p>Did you have to <u>stop</u> providing any services again during Sep-Dec (the 2<sup>nd</sup> wave)? Which ones?</p> |                                                                            |                                        |                                                                                  |                                                                           |

**Community Pharmacy COVID-19 Study ID \_\_\_\_\_**

**During the pandemic, a number of new services were commissioned; many pharmacies also developed new and innovative ways of working.**

| 5 Part I<br>Did you implement any of the following new ways of working in response to COVID-19 between March and May 2020 (Wave 1)?               | Part I                   | Part II                                 |
|---------------------------------------------------------------------------------------------------------------------------------------------------|--------------------------|-----------------------------------------|
|                                                                                                                                                   | Yes (Y)/No (N)           | Stopped at a later date? Yes (Y)/No (N) |
| 5.1 Community Pharmacy Emergency Supply during a Pandemic service                                                                                 | <input type="checkbox"/> | <input type="checkbox"/>                |
| 5.2 Prescription delivery services by volunteers                                                                                                  | <input type="checkbox"/> | <input type="checkbox"/>                |
| 5.3 Replenishment of Care Home Pandemic packs                                                                                                     | <input type="checkbox"/> | <input type="checkbox"/>                |
| 5.4 Palliative care on-call services                                                                                                              | <input type="checkbox"/> | <input type="checkbox"/>                |
| 5.5 Employment of additional staff, e.g. dentists, volunteers, undergraduate students, retired pharmacists                                        | <input type="checkbox"/> | <input type="checkbox"/>                |
| 5.6 Flu vaccination service (frontline Health and Social Care workers)                                                                            | <input type="checkbox"/> | <input type="checkbox"/>                |
| 5.7 Supply of medicines usually supplied in the hospital setting (e.g. oncology, antiretroviral drugs, 'Healthcare at Home')                      | <input type="checkbox"/> | <input type="checkbox"/>                |
| 5.8 Measures to flag/assist patients with sensitive issues such as domestic violence reporting                                                    | <input type="checkbox"/> | <input type="checkbox"/>                |
| 5.9 Drive-through pharmacy services (initiated or increased)                                                                                      | <input type="checkbox"/> | <input type="checkbox"/>                |
| 5.10 Daily reporting of staffing/stock situation to the Health and Social Care Board                                                              | <input type="checkbox"/> | <input type="checkbox"/>                |
| 5.11 Referrals to Test and Trace services                                                                                                         | <input type="checkbox"/> | <input type="checkbox"/>                |
| 5.12 Commissioned Prescription delivery service (starting Sept 2020)                                                                              | <input type="checkbox"/> | <input type="checkbox"/>                |
| 5.13 Any others? Please specify:<br>_____<br>_____<br>_____                                                                                       |                          |                                         |
| <b>Part II</b><br><b>And did you stop any of these afterwards at a later date?</b><br><i>[Record Y/N Yes (Y)/No (N) in 2<sup>nd</sup> column]</i> |                          |                                         |

Community Pharmacy COVID-19 Study ID \_\_\_\_\_

PREPAREDNESS

Having now had the experience of working during the pandemic, I'd like to ask you to reflect on how well prepared you felt you were.

| 6. Thinking back to the start of the initial outbreak of COVID-19 firstly in March-May 2020 and secondly in Sept-Dec 2020, did you have... | March - May 2020<br>(beginning of Wave 1)<br>Yes (Y)/No (N) | Sept - Dec 2020<br>(beginning of Wave 2)<br>Yes (Y)/No (N) |
|--------------------------------------------------------------------------------------------------------------------------------------------|-------------------------------------------------------------|------------------------------------------------------------|
| 6.1 A business continuity plan in place for use in the event of staff absence over a prolonged period?                                     | <input type="checkbox"/>                                    | <input type="checkbox"/>                                   |
| 6.2 A business continuity plan in place for use in the event of pharmacy closure?                                                          | <input type="checkbox"/>                                    | <input type="checkbox"/>                                   |
| 6.3 Enough stock and supply of essential prescription and OTC medicines?                                                                   | <input type="checkbox"/>                                    | <input type="checkbox"/>                                   |
| 6.4 Enough financial resources to cover the additional demands on your pharmacy business                                                   | <input type="checkbox"/>                                    | <input type="checkbox"/>                                   |
| 6.5 Enough stock and supply of hand sanitisers                                                                                             | <input type="checkbox"/>                                    | <input type="checkbox"/>                                   |
| 6.6 Enough <u>information</u> about PPE requirements for staff                                                                             | <input type="checkbox"/>                                    | <input type="checkbox"/>                                   |
| 6.7 Enough <u>supply</u> of PPE for staff                                                                                                  | <input type="checkbox"/>                                    | <input type="checkbox"/>                                   |
| 6.8 A system to manage quantity limits for patients for the supply of individual medicines                                                 | <input type="checkbox"/>                                    | <input type="checkbox"/>                                   |
| 6.9 Appropriate staff working patterns in place                                                                                            | <input type="checkbox"/>                                    | <input type="checkbox"/>                                   |
| 6.10 Did you have to close the pharmacy at any stage during the pandemic?                                                                  | <input type="checkbox"/>                                    | <input type="checkbox"/>                                   |
| 6.11 And if so, for how long?<br><i>[document free text response]</i>                                                                      |                                                             |                                                            |

1  
2  
3  
4  
5  
6  
7  
8  
9  
10  
11  
12  
13  
14  
15  
16  
17  
18  
19  
20  
21  
22  
23  
24  
25  
26  
27  
28  
29  
30  
31  
32  
33  
34  
35  
36  
37  
38  
39  
40  
41  
42  
43  
44  
45  
46  
47  
48  
49  
50  
51  
52  
53  
54  
55  
56  
57  
58  
59  
60

**Community Pharmacy COVID-19 Study ID \_\_\_\_\_**

**7.1** What single aspect of your work, if any, did you feel **MOST** prepared for during March to May 2020 (Wave 1)?

---



---

**7.2** What single aspect of your work, if any, did you feel **LEAST** prepared for during March to May 2020 (Wave 1)?

---



---

|                                                                                                                                            |                          |                          |
|--------------------------------------------------------------------------------------------------------------------------------------------|--------------------------|--------------------------|
| <b>7.3</b> Overall, did you feel better or worse prepared for working during Wave 2 in Sept-Dec 2020 compared to Wave 1 in March-May 2020? | <b>Better prepared</b>   | <b>Worse prepared</b>    |
|                                                                                                                                            | <input type="checkbox"/> | <input type="checkbox"/> |

**7.4** If worse, can you briefly explain why?

---



---



---

**COMMUNICATION**

Now I'd like you to think about how you were able to communicate with others during the pandemic.

|                                                                                                                                                                                                                                                                                                                       |                                                                                                                                                                                                                                                                                                                            |                          |
|-----------------------------------------------------------------------------------------------------------------------------------------------------------------------------------------------------------------------------------------------------------------------------------------------------------------------|----------------------------------------------------------------------------------------------------------------------------------------------------------------------------------------------------------------------------------------------------------------------------------------------------------------------------|--------------------------|
|                                                                                                                                                                                                                                                                                                                       | <b>Yes</b>                                                                                                                                                                                                                                                                                                                 | <b>No</b>                |
| <b>8.1</b> Did you communicate differently with GPs and patients during the pandemic?                                                                                                                                                                                                                                 | <input type="checkbox"/>                                                                                                                                                                                                                                                                                                   | <input type="checkbox"/> |
| <b>How did you communicate?</b>                                                                                                                                                                                                                                                                                       |                                                                                                                                                                                                                                                                                                                            |                          |
| <p><b>8.2 GPs</b></p> <p style="text-align: right;">Telephone <input type="checkbox"/></p> <p style="text-align: right;">E-mail <input type="checkbox"/></p> <p style="text-align: right;">Video call <input type="checkbox"/></p> <p style="text-align: right;">Other <input type="checkbox"/></p> <hr/> <hr/> <hr/> | <p><b>8.3 Patients</b></p> <p style="text-align: right;">Telephone <input type="checkbox"/></p> <p style="text-align: right;">E-mail <input type="checkbox"/></p> <p style="text-align: right;">Video call <input type="checkbox"/></p> <p style="text-align: right;">Other <input type="checkbox"/></p> <hr/> <hr/> <hr/> |                          |

**UPDATING PROFESSIONAL KNOWLEDGE**

**Community Pharmacy COVID-19 Study ID \_\_\_\_\_**

**This question is about keeping your clinical knowledge of COVID-19 up to date.**

|                                                                                    | Yes<br><input type="checkbox"/> | No<br><input type="checkbox"/> |
|------------------------------------------------------------------------------------|---------------------------------|--------------------------------|
| <b>9.1 Were sufficient training resources available to you?</b>                    |                                 |                                |
| <b>9.2 What resources did you use? Tick all that apply</b>                         |                                 |                                |
| Remote training (ECHO) sessions                                                    | <input type="checkbox"/>        |                                |
| Frequently Asked Questions for community pharmacists on the BSO website            | <input type="checkbox"/>        |                                |
| Distilled / summarised information sources provided by CPNI, NPA or your employer  | <input type="checkbox"/>        |                                |
| Internet                                                                           | <input type="checkbox"/>        |                                |
| Media                                                                              | <input type="checkbox"/>        |                                |
| Dept of Health, Health & Social Care Board, Public Health Agency COVID-19 guidance | <input type="checkbox"/>        |                                |
| Other, please specify                                                              | <input type="checkbox"/>        |                                |
| <hr/>                                                                              |                                 |                                |
| <hr/>                                                                              |                                 |                                |

**LOOKING TO THE FUTURE**

**The final few questions will focus on your views about returning to normal activities post-pandemic. On a scale of 1-5 where 1= strongly agree and 5= strongly disagree, please indicate your level of agreement with the following statements:**

| <b>10.1 I am confident that I will be able to re-establish normal patient care services post-pandemic</b> |       |                            |          |                   |
|-----------------------------------------------------------------------------------------------------------|-------|----------------------------|----------|-------------------|
| Strongly agree                                                                                            | Agree | Neither agree nor disagree | Disagree | Strongly disagree |
| 1                                                                                                         | 2     | 3                          | 4        | 5                 |

| <b>10.2 I am willing to provide and administer COVID-19 vaccinations when they are available through community pharmacies in N. Ireland</b> |       |                            |          |                   |
|---------------------------------------------------------------------------------------------------------------------------------------------|-------|----------------------------|----------|-------------------|
| Strongly agree                                                                                                                              | Agree | Neither agree nor disagree | Disagree | Strongly disagree |
| 1                                                                                                                                           | 2     | 3                          | 4        | 5                 |

| <b>10.3 I am willing to provide COVID-19 testing within the pharmacy if available in the future</b> |       |                            |          |                   |
|-----------------------------------------------------------------------------------------------------|-------|----------------------------|----------|-------------------|
| Strongly agree                                                                                      | Agree | Neither agree nor disagree | Disagree | Strongly disagree |
| 1                                                                                                   | 2     | 3                          | 4        | 5                 |

Community Pharmacy COVID-19 Study ID \_\_\_\_\_

1  
2  
3  
4  
5  
6  
7  
8  
9  
10  
11  
12  
13  
14  
15  
16  
17  
18  
19  
20  
21  
22  
23  
24  
25  
26  
27  
28  
29  
30  
31  
32  
33  
34  
35  
36  
37  
38  
39  
40  
41  
42  
43  
44  
45  
46  
47  
48  
49  
50  
51  
52  
53  
54  
55  
56  
57  
58  
59  
60

----- Blank Page -----

For peer review only

## Community Pharmacy COVID-19 Study ID \_\_\_\_\_

## ----- Section 3: Conclusion and Interview Information -----

**CONCLUSION Thank you for participating & information about participation in a future interview**

- Thank you very much for taking the time to answer these questions. Your responses will provide a very helpful insight into how community pharmacy has responded to the pandemic.
- This questionnaire is part of a larger study about community pharmacy and COVID-19. In the next stage, we plan to invite a range of key stakeholders to take part in interviews to explore, in more depth, the role of community pharmacists over the course of the pandemic. The interview will last about 40 minutes. If you think you might be willing to be interviewed, I can send you further information about what this will entail. Please be assured that by requesting information you are not committing to take part. Would you like more information about the study?

Yes No 

- **If the reply is yes,**

Could you provide me with your contact details?

- Name: \_\_\_\_\_
- E-mail address: \_\_\_\_\_
- Telephone number: \_\_\_\_\_

- **If the reply is no, thanks again for your time and goodbye.**

**STROBE 2007 (v4) Statement—Checklist of items that should be included in reports of *cross-sectional studies***

| Section/Topic                | Item # | Recommendation                                                                                                                                                                       | Reported on page # |
|------------------------------|--------|--------------------------------------------------------------------------------------------------------------------------------------------------------------------------------------|--------------------|
| <b>Title and abstract</b>    | 1      | (a) Indicate the study's design with a commonly used term in the title or the abstract                                                                                               | 1 and 2            |
|                              |        | (b) Provide in the abstract an informative and balanced summary of what was done and what was found                                                                                  | 2                  |
| <b>Introduction</b>          |        |                                                                                                                                                                                      |                    |
| Background/rationale         | 2      | Explain the scientific background and rationale for the investigation being reported                                                                                                 | 4                  |
| Objectives                   | 3      | State specific objectives, including any prespecified hypotheses                                                                                                                     | 4                  |
| <b>Methods</b>               |        |                                                                                                                                                                                      |                    |
| Study design                 | 4      | Present key elements of study design early in the paper                                                                                                                              | 4                  |
| Setting                      | 5      | Describe the setting, locations, and relevant dates, including periods of recruitment, exposure, follow-up, and data collection                                                      | 4, 6, 7            |
| Participants                 | 6      | (a) Give the eligibility criteria, and the sources and methods of selection of participants                                                                                          | 5, 6               |
| Variables                    | 7      | Clearly define all outcomes, exposures, predictors, potential confounders, and effect modifiers. Give diagnostic criteria, if applicable                                             | 5                  |
| Data sources/<br>measurement | 8*     | For each variable of interest, give sources of data and details of methods of assessment (measurement). Describe comparability of assessment methods if there is more than one group | 5                  |
| Bias                         | 9      | Describe any efforts to address potential sources of bias                                                                                                                            | 5, 6               |
| Study size                   | 10     | Explain how the study size was arrived at                                                                                                                                            | 5, 6               |
| Quantitative variables       | 11     | Explain how quantitative variables were handled in the analyses. If applicable, describe which groupings were chosen and why                                                         | 7                  |
| Statistical methods          | 12     | (a) Describe all statistical methods, including those used to control for confounding                                                                                                | 7                  |
|                              |        | (b) Describe any methods used to examine subgroups and interactions                                                                                                                  | N/A                |
|                              |        | (c) Explain how missing data were addressed                                                                                                                                          | N/A                |
|                              |        | (d) If applicable, describe analytical methods taking account of sampling strategy                                                                                                   | N/A                |
|                              |        | (e) Describe any sensitivity analyses                                                                                                                                                | N/A                |
| <b>Results</b>               |        |                                                                                                                                                                                      |                    |



|                          |     |                                                                                                                                                                                                              |                         |
|--------------------------|-----|--------------------------------------------------------------------------------------------------------------------------------------------------------------------------------------------------------------|-------------------------|
| Participants             | 13* | (a) Report numbers of individuals at each stage of study—eg numbers potentially eligible, examined for eligibility, confirmed eligible, included in the study, completing follow-up, and analysed            | 7, 8 (Table 1)          |
|                          |     | (b) Give reasons for non-participation at each stage                                                                                                                                                         | N/A                     |
|                          |     | (c) Consider use of a flow diagram                                                                                                                                                                           | N/A                     |
| Descriptive data         | 14* | (a) Give characteristics of study participants (eg demographic, clinical, social) and information on exposures and potential confounders                                                                     | 8 (Table 1 and Table 2) |
|                          |     | (b) Indicate number of participants with missing data for each variable of interest                                                                                                                          | N/A                     |
| Outcome data             | 15* | Report numbers of outcome events or summary measures                                                                                                                                                         | Tables 3-5; Figs 1-3    |
| Main results             | 16  | (a) Give unadjusted estimates and, if applicable, confounder-adjusted estimates and their precision (eg, 95% confidence interval). Make clear which confounders were adjusted for and why they were included | N/A                     |
|                          |     | (b) Report category boundaries when continuous variables were categorized                                                                                                                                    | N/A                     |
|                          |     | (c) If relevant, consider translating estimates of relative risk into absolute risk for a meaningful time period                                                                                             | N/A                     |
| Other analyses           | 17  | Report other analyses done—eg analyses of subgroups and interactions, and sensitivity analyses                                                                                                               | N/A                     |
| <b>Discussion</b>        |     |                                                                                                                                                                                                              |                         |
| Key results              | 18  | Summarise key results with reference to study objectives                                                                                                                                                     | 17                      |
| Limitations              | 19  | Discuss limitations of the study, taking into account sources of potential bias or imprecision. Discuss both direction and magnitude of any potential bias                                                   | 19                      |
| Interpretation           | 20  | Give a cautious overall interpretation of results considering objectives, limitations, multiplicity of analyses, results from similar studies, and other relevant evidence                                   | 17-20                   |
| Generalisability         | 21  | Discuss the generalisability (external validity) of the study results                                                                                                                                        | 19                      |
| <b>Other information</b> |     |                                                                                                                                                                                                              |                         |
| Funding                  | 22  | Give the source of funding and the role of the funders for the present study and, if applicable, for the original study on which the present article is based                                                | 20                      |

\*Give information separately for cases and controls in case-control studies and, if applicable, for exposed and unexposed groups in cohort and cross-sectional studies.

**Note:** An Explanation and Elaboration article discusses each checklist item and gives methodological background and published examples of transparent reporting. The STROBE checklist is best used in conjunction with this article (freely available on the Web sites of PLoS Medicine at <http://www.plosmedicine.org/>, Annals of Internal Medicine at <http://www.annals.org/>, and Epidemiology at <http://www.epidem.com/>). Information on the STROBE Initiative is available at [www.strobe-statement.org](http://www.strobe-statement.org).
